# Supplementary material for: The Global, Regional, and National Economic Burden of Malignant Bone and Joint Neoplasms and Soft-Tissue and Other Extraosseous Sarcomas: A Health-Economic Modeling Study
Source: Research Square preprint supplement (doi:10.21203/rs.3.rs-8249604/v1), 2025-12-09
Supplement: Supplementary file 1 [file 7db6f1d08867c51f2d6f618e.xlsx]

## Sheet: Sheet1
2021 VLW & VLW/GDP by Country for Total & Gender-stratified Soft Tissue and Other Extraosseous Sarcomas.
IE=1.00 Country	Total Soft Tissue and Other Extraosseous Sarcomas						Male Soft Tissue and Other Extraosseous Sarcomas						Female Soft Tissue and Other Extraosseous Sarcomas
	VLW($ billion）	VLW($ billion） [95% Cl]		VLW/GDP(%)	VLW/GDP(%) [95% Cl]		VLW($ billion）	VLW($ billion） [95% Cl]		VLW/GDP(%)	VLW/GDP(%) [95% Cl]		VLW($ billion）	VLW($ billion） [95% Cl]		VLW/GDP(%)	VLW/GDP(%) [95% Cl]
		upper	lower		upper	lower		upper	lower		upper	lower		upper	lower		upper	lower
Afghanistan	0.00158941	0.00253069	0.000958485	0.011146	0.0177468	0.00672149	0.000562907	0.000959534	0.000268166	0.00394745	0.00672885	0.00188055	0.00102651	0.00189571	0.000441606	0.00719851	0.0132939	0.00309681
Albania	0.00148989	0.00224016	0.00095056	0.00826247	0.0124233	0.00527152	0.000712129	0.00115065	0.000419551	0.00394925	0.00638113	0.0023267	0.000777761	0.00134218	0.000432346	0.00431322	0.0074433	0.00239766
Algeria	0.0111714	0.0222498	0.00626451	0.00599868	0.0119474	0.00336383	0.00609894	0.0141949	0.00263053	0.00327493	0.00762217	0.00141251	0.00507247	0.0100104	0.00216869	0.00272375	0.00537524	0.00116451
American Samoa	2.35801e-05	3.98639e-05	1.23419e-05	0.00314402	0.00531519	0.00164558	6.99029e-07	1.16917e-06	2.73368e-07	9.32039e-05	0.000155889	3.6449e-05	2.28811e-05	3.96777e-05	1.15572e-05	0.00305081	0.00529037	0.00154096
Andorra	0.00044413	0.000647039	0.000274532	0.0133587	0.0194619	0.00825747	0.000248284	0.000393107	0.00012219	0.00746798	0.011824	0.00367526	0.000195846	0.000323058	9.68278e-05	0.00589074	0.00971705	0.00291242
Angola	0.00615231	0.00939239	0.00367513	0.00925088	0.0141228	0.00552608	0.00353605	0.00606614	0.00170747	0.00531695	0.00912132	0.00256743	0.00261626	0.00466796	0.00118995	0.00393393	0.00701895	0.00178926
Antigua and Barbuda	0.000187446	0.00021493	0.000164535	0.0117054	0.0134216	0.0102746	5.81268e-05	7.10958e-05	4.75246e-05	0.00362982	0.00443969	0.00296775	0.000129319	0.000156666	0.000105761	0.00807556	0.00978326	0.00660441
Argentina	0.0711028	0.0787203	0.0639499	0.0146133	0.0161788	0.0131432	0.0387191	0.0450629	0.0332317	0.00795765	0.00926144	0.00682986	0.0323838	0.0385337	0.0274878	0.0066556	0.00791955	0.00564938
Armenia	0.00415676	0.00466522	0.00367201	0.0299502	0.0336137	0.0264575	0.00230832	0.00278022	0.00192949	0.0166318	0.020032	0.0139023	0.00184844	0.00223914	0.00155243	0.0133184	0.0161334	0.0111855
Australia	0.390916	0.42756	0.357648	0.0251113	0.0274652	0.0229743	0.212506	0.243373	0.190393	0.0136507	0.0156335	0.0122303	0.17841	0.202072	0.154374	0.0114605	0.0129805	0.00991649
Austria	0.121575	0.13629	0.107357	0.0253035	0.0283662	0.0223443	0.0632991	0.0750802	0.0532604	0.0131745	0.0156265	0.0110851	0.0582757	0.0687275	0.0492106	0.012129	0.0143043	0.0102422
Azerbaijan	0.00238661	0.0035079	0.00134453	0.00435312	0.00639832	0.00245239	0.00149574	0.00246455	0.000725809	0.00272819	0.00449527	0.00132385	0.000890872	0.00155452	0.000364203	0.00162493	0.0028354	0.000664296
Bahamas	0.001753	0.00199825	0.00154104	0.0154192	0.0175765	0.0135549	0.00102532	0.00125179	0.000841963	0.00901863	0.0110106	0.00740585	0.000727676	0.00089147	0.000581996	0.00640059	0.0078413	0.00511919
Bahrain	0.00158901	0.00220408	0.00107796	0.0038908	0.00539683	0.00263947	0.00103985	0.00152124	0.000608147	0.00254615	0.00372486	0.00148909	0.000549158	0.000828443	0.000326835	0.00134465	0.0020285	0.000800278
Bangladesh	0.0314871	0.0621711	0.0177589	0.00756408	0.0149352	0.00426618	0.0172876	0.0423501	0.00689862	0.00415296	0.0101737	0.00165724	0.0141995	0.027098	0.00626176	0.00341112	0.00650969	0.00150425
Barbados	0.00197967	0.00226096	0.00175983	0.0375275	0.0428599	0.0333601	0.000711317	0.000856486	0.000590801	0.0134841	0.016236	0.0111995	0.00126835	0.00154998	0.00103793	0.0240434	0.0293821	0.0196755
Belarus	0.0157268	0.0180049	0.0139754	0.0225721	0.0258418	0.0200583	0.00766399	0.00930008	0.00633799	0.0109998	0.013348	0.00909667	0.00806284	0.00985019	0.00653422	0.0115723	0.0141376	0.00937831
Belgium	0.168075	0.189517	0.149614	0.028083	0.0316656	0.0249984	0.0852544	0.100787	0.0712423	0.0142448	0.0168401	0.0119036	0.0828204	0.0984695	0.0712161	0.0138381	0.0164529	0.0118992
Belize	0.000135267	0.00015466	0.000118128	0.00558826	0.00638944	0.00488021	8.42918e-05	0.000103804	6.82936e-05	0.00348234	0.00428846	0.00282141	5.09748e-05	6.24627e-05	4.12583e-05	0.00210592	0.00258052	0.0017045
Benin	0.000994043	0.00161092	0.000490822	0.00561921	0.00910632	0.00277456	0.000619302	0.00109918	0.000254954	0.00350084	0.00621357	0.00144122	0.000374741	0.000744272	0.000139495	0.00211837	0.00420728	0.000788549
Bermuda	0.00245808	0.00281859	0.00215983	0.0337342	0.0386818	0.0296411	0.0012391	0.00152014	0.00101661	0.0170052	0.020862	0.0139517	0.00121898	0.00151086	0.000973195	0.016729	0.0207347	0.0133559
Bhutan	0.000238895	0.000459664	0.000127738	0.00862809	0.0166015	0.00461347	0.000137202	0.000341616	5.17143e-05	0.00495528	0.012338	0.00186775	0.000101693	0.000197554	4.42661e-05	0.00367281	0.00713499	0.00159875
Bolivia (Plurinational State of)	0.00634	0.00936466	0.00407375	0.0156907	0.0231764	0.010082	0.00286648	0.00463001	0.00144313	0.00709418	0.0114587	0.00357157	0.00347352	0.00601835	0.00164652	0.00859652	0.0148947	0.00407493
Bosnia and Herzegovina	0.00262789	0.00348019	0.00170504	0.0111009	0.0147013	0.00720257	0.00123014	0.00188052	0.000648091	0.00519645	0.00794385	0.00273771	0.00139775	0.00207406	0.000773229	0.00590449	0.0087614	0.00326633
Botswana	0.00269975	0.00406424	0.00160813	0.014398	0.0216748	0.00857624	0.00143946	0.00245108	0.00069439	0.00767671	0.0130717	0.00370323	0.0012603	0.00218868	0.000574702	0.00672124	0.0116724	0.00306492
Brazil	0.253889	0.279872	0.23355	0.0151971	0.0167523	0.0139796	0.130001	0.146817	0.116696	0.0077815	0.00878803	0.00698506	0.123888	0.139657	0.108201	0.00741557	0.00835947	0.00647659
Brunei Darussalam	0.0022394	0.0031569	0.00147933	0.0159883	0.0225389	0.0105617	0.00116599	0.00186763	0.000687169	0.00832464	0.013334	0.00490607	0.00107341	0.00169697	0.00054585	0.00766365	0.0121156	0.00389712
Bulgaria	0.0153027	0.0170632	0.0137082	0.0181273	0.0202127	0.0162384	0.00816723	0.00965676	0.00687668	0.00967475	0.0114392	0.00814599	0.00713548	0.00865842	0.00592597	0.00845256	0.0102566	0.0070198
Burkina Faso	0.00152016	0.00235176	0.000893533	0.00771752	0.0119394	0.00453627	0.000975072	0.00163282	0.000435504	0.00495023	0.00828949	0.00221096	0.000545088	0.000987386	0.000232087	0.00276729	0.00501274	0.00117826
Burundi	0.000466892	0.000735295	0.000272794	0.0168201	0.0264895	0.00982757	0.000258489	0.000439153	0.000117156	0.00931222	0.0158208	0.00422063	0.000208404	0.000404318	8.48648e-05	0.00750789	0.0145658	0.00305731
C?te d'Ivoire	0.00368429	0.00549485	0.00212414	0.00506121	0.00754843	0.00291799	0.00221791	0.00377627	0.00104346	0.00304681	0.00518756	0.00143344	0.00146638	0.00262176	0.000632611	0.0020144	0.00360158	0.000869035
Cabo Verde	0.000102975	0.000160271	5.53281e-05	0.00501865	0.00781108	0.00269651	7.32086e-05	0.000127442	3.3838e-05	0.00356795	0.00621108	0.00164915	2.97663e-05	5.38265e-05	1.35469e-05	0.00145071	0.00262333	0.00066023
Cambodia	0.00370173	0.00547017	0.0023895	0.0100618	0.0148686	0.00649493	0.00166029	0.00276728	0.000790802	0.00451286	0.0075218	0.00214949	0.00204145	0.00349472	0.000941092	0.00554889	0.00949906	0.002558
Cameroon	0.00372731	0.00569683	0.00226289	0.00828071	0.0126563	0.0050273	0.00252516	0.00412976	0.00117847	0.00560997	0.00917481	0.00261813	0.00120215	0.00215252	0.00053423	0.00267074	0.00478211	0.00118686
Canada	0.482367	0.537252	0.429073	0.0240286	0.0267626	0.0213738	0.252188	0.289937	0.218783	0.0125625	0.0144429	0.0108984	0.230179	0.270498	0.200748	0.0114661	0.0134746	0.01
Central African Republic	0.000550577	0.000871129	0.000331081	0.0218787	0.0346167	0.0131564	0.000351991	0.000613214	0.000161944	0.0139873	0.0243677	0.00643527	0.000198586	0.000389837	8.09873e-05	0.00789138	0.0154913	0.00321825
Chad	0.00094492	0.00148579	0.000560865	0.0080214	0.0126129	0.00476117	0.000644884	0.00112469	0.000292471	0.0054744	0.00954745	0.00248278	0.000300036	0.00054899	0.000121642	0.002547	0.00466036	0.00103261
Chile	0.0465404	0.0518867	0.041456	0.0147506	0.0164451	0.0131391	0.024364	0.0287466	0.0205154	0.00772197	0.00911099	0.00650221	0.0221765	0.0268402	0.0185575	0.00702866	0.00850679	0.00588166
China	1.06324	1.54261	0.690505	0.00596642	0.00865641	0.00387479	0.641593	0.982495	0.372942	0.00360032	0.0055133	0.00209277	0.421651	0.657982	0.248157	0.0023661	0.00369228	0.00139254
Colombia	0.0513529	0.0560945	0.0464849	0.0161221	0.0176107	0.0145938	0.026739	0.0310152	0.023417	0.00839464	0.00973714	0.00735171	0.0246139	0.0279732	0.0210712	0.00772746	0.00878213	0.00661526
Comoros	0.000282168	0.000446889	0.000163537	0.0217707	0.0344798	0.0126177	0.000142894	0.000245914	6.43321e-05	0.011025	0.0189735	0.00496356	0.000139274	0.000243385	5.75816e-05	0.0107457	0.0187784	0.00444272
Congo	0.00152437	0.00231726	0.000906909	0.0102819	0.01563	0.00611715	0.000775576	0.00131434	0.000388525	0.0052313	0.00886528	0.00262062	0.000748791	0.00131037	0.000337769	0.00505063	0.00883853	0.00227827
Costa Rica	0.0115733	0.013282	0.0100764	0.0178158	0.0204463	0.0155116	0.00613093	0.00733869	0.00507092	0.0094379	0.0112971	0.00780614	0.00544234	0.00653267	0.00447199	0.00837789	0.0100563	0.00688414
Croatia	0.0180138	0.02035	0.0160234	0.0261043	0.0294899	0.0232201	0.00939192	0.0111209	0.00781363	0.0136101	0.0161157	0.011323	0.00862184	0.0103954	0.00713837	0.0124942	0.0150643	0.0103444
Cyprus	0.00621221	0.00868901	0.00427423	0.0204532	0.0286078	0.0140725	0.00302595	0.00451463	0.00172343	0.00996269	0.014864	0.00567425	0.00318626	0.00488378	0.00174377	0.0104905	0.0160794	0.00574121
Czechia	0.0818509	0.0921884	0.0725204	0.0281301	0.0316828	0.0249234	0.0413021	0.0486739	0.0344796	0.0141945	0.016728	0.0118498	0.0405488	0.0491263	0.0331097	0.0139356	0.0168835	0.011379
Democratic Republic of the Congo	0.00459948	0.00715373	0.00292749	0.00831303	0.0129296	0.00529111	0.00244986	0.0041465	0.00115879	0.00442784	0.00749433	0.00209439	0.00214962	0.00393289	0.00087633	0.00388519	0.00710826	0.00158387
Denmark	0.0987595	0.110887	0.0867082	0.0241833	0.0271529	0.0212323	0.0529847	0.063082	0.0440958	0.0129744	0.015447	0.0107978	0.0457747	0.0537362	0.038207	0.0112089	0.0131584	0.0093558
Djibouti	0.000733257	0.0011767	0.000419598	0.0216567	0.0347536	0.0123928	0.000459741	0.000830196	0.000217576	0.0135784	0.0245198	0.00642607	0.000273517	0.000469136	0.000126839	0.00807829	0.0138559	0.00374618
Dominica	9.89881e-05	0.000130293	7.05241e-05	0.0178271	0.023465	0.0127009	4.95674e-05	6.94063e-05	2.96607e-05	0.00892677	0.0124996	0.00534171	4.94206e-05	7.2033e-05	3.07173e-05	0.00890034	0.0129727	0.00553199
Dominican Republic	0.00608443	0.00851312	0.00383043	0.00645608	0.00903312	0.0040644	0.00302824	0.00483756	0.00158588	0.00321321	0.00513304	0.00168275	0.00305619	0.00514639	0.00164309	0.00324287	0.00546074	0.00174345
Ecuador	0.0154295	0.0172628	0.0136136	0.0143617	0.0160681	0.0126715	0.00715827	0.00868673	0.00597364	0.00666288	0.00808556	0.00556023	0.00827125	0.010157	0.00680245	0.00769884	0.00945405	0.00633169
Egypt	0.0130578	0.0183921	0.00777726	0.00307479	0.00433091	0.00183136	0.00733761	0.0118085	0.00350894	0.00172783	0.00278062	0.00082627	0.00572015	0.00906386	0.00297674	0.00134696	0.00213432	0.000700952
El Salvador	0.00319282	0.00412344	0.00223286	0.0109934	0.0141976	0.00768807	0.00159283	0.00224465	0.00092667	0.00548436	0.00772868	0.00319067	0.00159999	0.00234573	0.00100102	0.00550902	0.0080767	0.00344668
Equatorial Guinea	0.000772055	0.0011902	0.000450184	0.0063201	0.00974303	0.00368524	0.000449154	0.000768695	0.000205582	0.0036768	0.00629259	0.00168291	0.000322902	0.000606299	0.000139265	0.00264329	0.0049632	0.00114003
Estonia	0.00713161	0.0080754	0.00630414	0.0191687	0.0217054	0.0169445	0.00354937	0.00424519	0.00295965	0.00954015	0.0114104	0.00795507	0.00358224	0.0043846	0.00290029	0.0096285	0.0117851	0.00779552
Eswatini	0.000938077	0.00139588	0.000560812	0.0198004	0.0294635	0.0118373	0.000527556	0.000940548	0.000256069	0.0111353	0.0198525	0.00540496	0.000410521	0.000759438	0.000181005	0.00866504	0.0160298	0.00382056
Ethiopia	0.0203974	0.0323683	0.0121227	0.0183328	0.029092	0.0108957	0.0110878	0.0201448	0.00508127	0.00996549	0.0181058	0.00456695	0.00930965	0.0165142	0.00399983	0.00836733	0.0148426	0.00359497
Fiji	0.000261133	0.000436896	0.000149882	0.00606576	0.0101485	0.00348155	0.000116498	0.000251855	5.49025e-05	0.0027061	0.00585024	0.00127531	0.000144634	0.000259801	7.45398e-05	0.00335966	0.00603481	0.00173146
Finland	0.090608	0.102387	0.0795167	0.0307957	0.0347991	0.027026	0.0476877	0.0571792	0.0401207	0.016208	0.019434	0.0136361	0.0429203	0.0503533	0.0351869	0.0145877	0.017114	0.0119593
France	0.82457	0.895252	0.767425	0.0277967	0.0301794	0.0258703	0.430115	0.482193	0.389251	0.0144994	0.016255	0.0131219	0.394455	0.43289	0.356533	0.0132973	0.0145929	0.0120189
Gabon	0.00159855	0.00240217	0.000974403	0.0082209	0.0123537	0.00501109	0.000998604	0.0017165	0.000487312	0.00513555	0.0088275	0.00250611	0.000599945	0.00102808	0.000262509	0.00308535	0.00528714	0.00135001
Gambia	0.000128021	0.000194104	7.49594e-05	0.00635608	0.00963696	0.00372162	8.89982e-05	0.000150517	4.15874e-05	0.00441863	0.00747296	0.00206475	3.90233e-05	7.29959e-05	1.57396e-05	0.00193745	0.00362414	0.00078145
Georgia	0.0059285	0.0066801	0.00521867	0.0314457	0.0354324	0.0276807	0.00342875	0.00410436	0.00286329	0.0181866	0.0217702	0.0151873	0.00249975	0.00302913	0.00209048	0.0132591	0.016067	0.0110883
Germany	1.49988	1.62721	1.36288	0.0344936	0.0374218	0.0313428	0.791051	0.875277	0.711967	0.0181922	0.0201292	0.0163735	0.708833	0.794029	0.621623	0.0163014	0.0182607	0.0142958
Ghana	0.0047405	0.00705247	0.00292834	0.00596107	0.00886831	0.00368232	0.00294393	0.00498657	0.00132259	0.00370192	0.00627048	0.00166312	0.00179657	0.00319707	0.000810129	0.00225914	0.00402024	0.00101872
Greece	0.056959	0.0639013	0.0505753	0.0260916	0.0292717	0.0231674	0.0315092	0.0376116	0.0266733	0.0144336	0.017229	0.0122184	0.0254498	0.0301868	0.0212066	0.011658	0.0138279	0.00971425
Greenland	0.0004478	0.00066874	0.000291134	0.0138389	0.0206669	0.00899724	0.000230324	0.000385933	0.000127546	0.00711796	0.011927	0.0039417	0.000217477	0.000383631	0.000125684	0.00672094	0.0118558	0.00388416
Grenada	0.000184158	0.000211893	0.000162723	0.0164017	0.0188718	0.0144926	7.94796e-05	9.44448e-05	6.54974e-05	0.00707869	0.00841154	0.0058334	0.000104679	0.000128818	8.40427e-05	0.00932299	0.0114729	0.0074851
Guam	0.000119261	0.000135486	0.000105393	0.00191307	0.00217334	0.00169061	7.34363e-05	8.93698e-05	6.13716e-05	0.001178	0.00143359	0.000984466	4.58245e-05	5.58714e-05	3.73637e-05	0.000735074	0.000896236	0.000599353
Guatemala	0.00504588	0.00568958	0.00443707	0.00583481	0.00657916	0.00513082	0.00234256	0.00280739	0.00195215	0.00270882	0.00324633	0.00225738	0.00270332	0.00330749	0.00221493	0.00312599	0.00382463	0.00256124
Guinea	0.0015687	0.00235202	0.000934199	0.00919026	0.0137794	0.00547304	0.0009121	0.00154744	0.000424142	0.00534357	0.00906571	0.00248485	0.000656596	0.00117915	0.000281078	0.00384669	0.0069081	0.0016467
Guinea-Bissau	0.000143614	0.000219121	8.38195e-05	0.007747	0.0118201	0.00452151	9.24393e-05	0.000164811	4.05485e-05	0.00498648	0.00889048	0.00218732	5.11744e-05	9.26588e-05	2.09559e-05	0.00276052	0.00499833	0.00113043
Guyana	0.000880946	0.00102281	0.000769185	0.0109552	0.0127194	0.00956535	0.000361265	0.000445356	0.000293603	0.00449258	0.00553831	0.00365116	0.000519681	0.00065188	0.000420347	0.0064626	0.00810659	0.0052273
Haiti	0.0056734	0.00858826	0.00316379	0.0271748	0.0411366	0.0151542	0.00228507	0.00387586	0.00104359	0.0109452	0.0185648	0.00499867	0.00338834	0.00612428	0.00146931	0.0162297	0.0293345	0.0070378
Honduras	0.00398824	0.00584255	0.00247879	0.0141707	0.0207592	0.00880744	0.00173052	0.00286162	0.000827362	0.00614873	0.0101677	0.00293971	0.00225772	0.00387947	0.00109042	0.00802192	0.0137842	0.00387437
Hungary	0.0628735	0.0694821	0.0564923	0.034525	0.0381539	0.031021	0.0319263	0.0374378	0.0272671	0.0175313	0.0205578	0.0149729	0.0309472	0.0358444	0.026457	0.0169937	0.0196828	0.014528
Iceland	0.00526079	0.00601462	0.00462719	0.0203707	0.0232896	0.0179173	0.00314791	0.00377455	0.00259103	0.0121893	0.0146157	0.0100329	0.00211288	0.00243016	0.00179916	0.00818144	0.00941002	0.00696666
India	0.318338	0.451896	0.193718	0.0100508	0.0142677	0.00611625	0.175816	0.282559	0.0832533	0.00555104	0.00892121	0.00262855	0.142521	0.241944	0.0714219	0.00449981	0.00763888	0.002255
Indonesia	0.0968104	0.14661	0.0582627	0.00815926	0.0123564	0.00491043	0.040771	0.068317	0.0203018	0.00343621	0.00575781	0.00171105	0.0560394	0.0977333	0.0251333	0.00472305	0.00823704	0.00211826
Iran (Islamic Republic of)	0.0338284	0.049173	0.0207624	0.00882243	0.0128243	0.00541482	0.0185373	0.0290565	0.00990615	0.00483451	0.00757793	0.00258352	0.0152911	0.0271855	0.0074527	0.00398792	0.00708996	0.00194366
Iraq	0.00991271	0.0149704	0.00615494	0.00472727	0.00713924	0.00293523	0.00543841	0.00895246	0.00291214	0.00259352	0.00426934	0.00138877	0.00447431	0.00751016	0.00217198	0.00213375	0.00358152	0.0010358
Ireland	0.104898	0.119545	0.0915312	0.0197434	0.0225001	0.0172276	0.055284	0.0656012	0.0452963	0.0104053	0.0123472	0.00852545	0.0496139	0.0581821	0.0412749	0.00933809	0.0109508	0.00776858
Israel	0.103225	0.116692	0.0910709	0.021079	0.0238289	0.018597	0.0572041	0.0676436	0.0478986	0.0116813	0.013813	0.00978104	0.0460213	0.0562839	0.0386261	0.0093977	0.0114933	0.00788757
Italy	0.600996	0.679759	0.524268	0.0275787	0.031193	0.0240578	0.323244	0.385519	0.270408	0.0148331	0.0176908	0.0124085	0.277752	0.326153	0.228881	0.0127456	0.0149666	0.0105029
Jamaica	0.00301729	0.00344283	0.00264244	0.0205852	0.0234884	0.0180278	0.00162831	0.00197352	0.00132683	0.011109	0.0134642	0.00905217	0.00138898	0.00170731	0.00112011	0.00947615	0.011648	0.00764185
Japan	0.882958	1.00901	0.760457	0.0175377	0.0200414	0.0151046	0.483407	0.572987	0.407232	0.00960166	0.0113809	0.00808864	0.399551	0.473472	0.321097	0.00793606	0.00940432	0.00637777
Jordan	0.00175009	0.00258249	0.00114115	0.0037802	0.00557819	0.0024649	0.00104275	0.00159196	0.00059012	0.00225235	0.00343864	0.00127466	0.000707335	0.00118971	0.000356802	0.00152785	0.00256978	0.000770696
Kazakhstan	0.0320821	0.0357354	0.0286066	0.0162761	0.0181295	0.0145129	0.0184786	0.0218755	0.0155315	0.00937465	0.011098	0.00787954	0.0136036	0.0167386	0.0113016	0.00690143	0.00849192	0.00573357
Kenya	0.0137298	0.0205875	0.00876233	0.0125153	0.0187665	0.00798728	0.00704741	0.0117816	0.00339963	0.00642404	0.0107394	0.00309892	0.00668235	0.0114862	0.00300301	0.00609128	0.0104702	0.00273738
Kiribati	1.17117e-05	2.06371e-05	6.91463e-06	0.00404772	0.0071325	0.0023898	4.6952e-06	1.10824e-05	1.94943e-06	0.00162273	0.00383024	0.000673752	7.01645e-06	1.26601e-05	3.09542e-06	0.00242499	0.00437554	0.00106982
Kuwait	0.0046156	0.00525521	0.00403903	0.003109	0.00353983	0.00272063	0.00304119	0.00363683	0.00249562	0.0020485	0.00244972	0.00168102	0.00157441	0.00192942	0.00127037	0.0010605	0.00129963	0.000855705
Kyrgyzstan	0.000962871	0.00109231	0.000838568	0.0104104	0.0118099	0.00906645	0.000529135	0.000640332	0.000434279	0.00572092	0.00692315	0.00469535	0.000433736	0.000528733	0.000347981	0.00468948	0.00571657	0.00376231
Lao People's Democratic Republic	0.00158209	0.0023073	0.000959212	0.00840326	0.0122551	0.00509484	0.000795293	0.00135844	0.000375076	0.00422418	0.0072153	0.00199221	0.000786802	0.00135697	0.000366268	0.00417908	0.00720751	0.00194542
Latvia	0.0116835	0.0132033	0.0103652	0.0305969	0.0345769	0.0271446	0.00558409	0.00670962	0.00464368	0.0146237	0.0175713	0.012161	0.00609939	0.0074986	0.00499916	0.0159732	0.0196375	0.0130919
Lebanon	0.00246319	0.0036236	0.00160421	0.0106485	0.0156649	0.00693505	0.00148739	0.0023782	0.000867423	0.00643001	0.010281	0.00374989	0.000975807	0.00149881	0.000537603	0.00421844	0.00647938	0.00232407
Lesotho	0.000505852	0.000759079	0.000306422	0.0209712	0.0314693	0.0127034	0.00026544	0.000442922	0.000124383	0.0110044	0.0183623	0.00515656	0.000240412	0.00043499	0.00011007	0.00996681	0.0180334	0.0045632
Liberia	0.000209181	0.000336448	0.000119639	0.0059544	0.0095771	0.00340556	0.000131941	0.000228285	5.82384e-05	0.00375573	0.00649821	0.00165777	7.72404e-05	0.000146807	3.31407e-05	0.00219867	0.0041789	0.000943361
Libya	0.00774952	0.0142405	0.00429707	0.0220044	0.0404354	0.0122013	0.0040552	0.00925492	0.00162665	0.0115146	0.0262789	0.0046188	0.00369432	0.00728898	0.00157928	0.0104899	0.0206968	0.00448429
Lithuania	0.0203256	0.0230476	0.0179358	0.0303199	0.0343802	0.0267549	0.00934927	0.0113215	0.00780211	0.0139464	0.0168883	0.0116385	0.0109764	0.0135216	0.00897503	0.0163735	0.0201702	0.0133881
Luxembourg	0.0187044	0.0213158	0.0165766	0.021855	0.0249062	0.0193688	0.0110385	0.0132545	0.00924338	0.0128978	0.0154871	0.0108003	0.00766592	0.00889446	0.00644056	0.00895717	0.0103927	0.00752542
Madagascar	0.00208785	0.00311393	0.00126158	0.0143448	0.0213946	0.00866784	0.000974225	0.00163473	0.000432841	0.00669352	0.0112316	0.00297388	0.00111363	0.00187887	0.000475237	0.00765129	0.012909	0.00326517
Malawi	0.00208503	0.00301356	0.00128143	0.0168444	0.0243458	0.0103524	0.00111906	0.00187828	0.000498329	0.00904063	0.0151742	0.00402589	0.000965967	0.00173506	0.000428858	0.00780382	0.0140171	0.00346464
Malaysia	0.0280938	0.0368441	0.0200227	0.00751604	0.00985703	0.00535673	0.0136403	0.0197764	0.00808756	0.00364924	0.00529084	0.00216369	0.0144535	0.0210398	0.00865383	0.0038668	0.00562886	0.00231519
Maldives	9.26568e-05	0.000131843	6.27622e-05	0.00176407	0.00251012	0.00119491	4.77141e-05	7.42217e-05	2.94331e-05	0.000908415	0.00141309	0.000560368	4.49427e-05	6.42578e-05	2.71463e-05	0.000855651	0.00122339	0.000516831
Mali	0.00082403	0.00141744	0.00048174	0.0042675	0.00734067	0.00249484	0.00049878	0.00108816	0.00021451	0.00258308	0.00563537	0.00111091	0.000325251	0.000599882	0.000137121	0.00168441	0.00310667	0.000710125
Malta	0.00494089	0.00560064	0.00431418	0.0250571	0.0284029	0.0218788	0.00250033	0.00300432	0.0020412	0.0126801	0.015236	0.0103516	0.00244056	0.00284651	0.00205901	0.012377	0.0144357	0.010442
Marshall Islands	9.26699e-06	1.51941e-05	4.73877e-06	0.00357937	0.0058687	0.00183035	2.95035e-06	5.15661e-06	1.27057e-06	0.00113957	0.00199174	0.000490757	6.31664e-06	1.11608e-05	2.80301e-06	0.0024398	0.00431087	0.00108266
Mauritania	0.000420541	0.000631594	0.000244827	0.00455993	0.00684838	0.00265466	0.000262416	0.000430383	0.000119432	0.00284538	0.00466664	0.001295	0.000158125	0.000282962	6.7224e-05	0.00171455	0.00306815	0.00072891
Mauritius	0.00148308	0.0016748	0.00131901	0.0129139	0.0145833	0.0114852	0.000847629	0.00100955	0.000710203	0.00738073	0.00879067	0.00618409	0.000635449	0.000765259	0.000523058	0.00553318	0.00666349	0.00455453
Mexico	0.217556	0.244066	0.192425	0.0165245	0.0185381	0.0146156	0.112332	0.134386	0.094351	0.00853221	0.0102073	0.00716642	0.105224	0.123105	0.0883312	0.00799228	0.00935041	0.00670919
Micronesia (Federated States of)	9.19053e-06	1.53017e-05	5.47709e-06	0.00235655	0.00392352	0.00140438	3.01305e-06	5.94446e-06	1.54077e-06	0.000772577	0.00152422	0.000395068	6.17748e-06	1.01129e-05	2.41591e-06	0.00158397	0.00259305	0.000619465
Monaco	0.000314725	0.000489035	0.000102975	0.00364973	0.00567113	0.00119416	0.000146377	0.000264683	4.06476e-05	0.00169746	0.00306942	0.000471373	0.000168348	0.000320519	4.7372e-05	0.00195226	0.00371692	0.000549352
Mongolia	0.00112915	0.0015242	0.000768819	0.00738661	0.00997094	0.00502942	0.000538086	0.000791687	0.000293168	0.00352002	0.00517902	0.00191783	0.000591064	0.000890723	0.000322793	0.00386659	0.00582688	0.00211163
Montenegro	0.000309358	0.000411019	0.000183648	0.00527785	0.00701226	0.00313315	0.000176473	0.00025745	8.92331e-05	0.00301075	0.00439228	0.00152238	0.000132884	0.000196239	6.58698e-05	0.0022671	0.00334797	0.00112378
Morocco	0.00873883	0.0149515	0.00495904	0.00615315	0.0105276	0.00349174	0.00522775	0.0105907	0.00228499	0.00368094	0.00745709	0.0016089	0.00351108	0.00610301	0.00155407	0.00247221	0.00429722	0.00109425
Mozambique	0.00350721	0.0053516	0.00196144	0.0216922	0.0330998	0.0121316	0.00199908	0.00353436	0.000964713	0.0123644	0.0218601	0.00596678	0.00150813	0.00266356	0.000681987	0.00932785	0.0164742	0.00421812
Myanmar	0.00664747	0.010005	0.00393672	0.0100195	0.0150801	0.00593369	0.00281363	0.00479231	0.00130615	0.00424089	0.00722329	0.00196871	0.00383384	0.00664323	0.00177966	0.00577862	0.0100131	0.00268242
Namibia	0.00167568	0.00253947	0.00103955	0.0135109	0.0204755	0.00838181	0.000956781	0.00156137	0.000501746	0.00771443	0.0125892	0.00404553	0.000718902	0.00129465	0.000343717	0.00579643	0.0104387	0.00277135
Nauru	5.12541e-06	8.51851e-06	2.59897e-06	0.00292023	0.00485347	0.00148078	1.65594e-06	2.82624e-06	6.95809e-07	0.000943481	0.00161027	0.000396441	3.46947e-06	6.30571e-06	1.48229e-06	0.00197675	0.00359271	0.000844543
Nepal	0.00365853	0.00740547	0.00209028	0.00990804	0.0200555	0.0056609	0.00200479	0.00503979	0.000815413	0.00542939	0.0136488	0.0022083	0.00165373	0.00320455	0.000730537	0.00447865	0.00867857	0.00197844
Netherlands	0.234394	0.255027	0.215458	0.0222286	0.0241853	0.0204328	0.121865	0.139117	0.107726	0.011557	0.013193	0.0102161	0.112529	0.128019	0.0978791	0.0106716	0.0121406	0.00928228
New Zealand	0.0451145	0.0514407	0.0403168	0.0177865	0.0202807	0.015895	0.0289758	0.0346525	0.0241859	0.0114238	0.0136619	0.00953539	0.0161387	0.0186152	0.0137213	0.00636275	0.00733908	0.00540965
Nicaragua	0.0011383	0.00150825	0.000843433	0.00804792	0.0106635	0.00596316	0.000559803	0.000769164	0.000349802	0.00395787	0.00543807	0.00247314	0.0005785	0.000784478	0.000357154	0.00409005	0.00554634	0.00252512
Niger	0.00090034	0.00142158	0.000516688	0.00603647	0.0095312	0.00346422	0.000570226	0.00100935	0.000253101	0.00382317	0.00676734	0.00169695	0.000330114	0.000615712	0.000136698	0.0022133	0.00412814	0.000916515
Nigeria	0.0501617	0.0833982	0.0296364	0.0113788	0.0189183	0.00672281	0.0337372	0.0656282	0.0144807	0.00765304	0.0148873	0.00328484	0.0164245	0.0306989	0.00658353	0.00372578	0.00696383	0.00149343
North Macedonia	0.00183415	0.00234756	0.0012271	0.0131008	0.016768	0.00876484	0.000775115	0.0010891	0.000429128	0.00553642	0.0077791	0.00306514	0.00105903	0.00146294	0.000634336	0.00756436	0.0104493	0.00453088
Northern Mariana Islands	2.4522e-06	3.59842e-06	1.58576e-06	0.000268293	0.0003937	0.000173497	1.57264e-06	2.3891e-06	8.10569e-07	0.000172062	0.000261389	8.86837e-05	8.79558e-07	1.34878e-06	4.85575e-07	9.62317e-05	0.000147569	5.31264e-05
Norway	0.127599	0.144663	0.111483	0.025349	0.028739	0.0221473	0.069229	0.0843772	0.057765	0.0137531	0.0167625	0.0114757	0.0583696	0.0688829	0.0477705	0.0115958	0.0136844	0.00949018
Oman	0.00187614	0.00285601	0.00105462	0.00214848	0.0032706	0.00120771	0.00133985	0.00224123	0.000647799	0.00153434	0.00256658	0.000741835	0.000536289	0.000952107	0.00025034	0.000614139	0.00109032	0.000286681
Pakistan	0.0547968	0.0955467	0.0320593	0.0157229	0.0274153	0.0091988	0.0293683	0.068702	0.0116744	0.00842666	0.0197127	0.00334975	0.0254285	0.0454565	0.0108956	0.0072962	0.0130428	0.00312627
Palau	1.58733e-06	2.80597e-06	6.59566e-07	0.000673303	0.00119022	0.00027977	3.62989e-09	7.16255e-09	8.52197e-11	1.5397e-06	3.03816e-06	3.61479e-08	1.5837e-06	2.8028e-06	6.48938e-07	0.000671763	0.00118887	0.000275262
Panama	0.00709858	0.00809465	0.00618926	0.0105326	0.0120105	0.00918337	0.00374404	0.00448235	0.00308285	0.00555525	0.00665072	0.0045742	0.00335455	0.00412557	0.00269777	0.00497734	0.00612135	0.00400284
Papua New Guinea	0.000469918	0.000757609	0.000236913	0.0017998	0.00290167	0.000907384	0.000112848	0.000201348	4.21816e-05	0.000432213	0.00077117	0.000161557	0.00035707	0.000637522	0.00015441	0.00136759	0.00244173	0.000591396
Paraguay	0.00484572	0.00668731	0.00340632	0.0121292	0.0167388	0.00852627	0.00275988	0.00415997	0.00165874	0.00690817	0.0104127	0.00415195	0.00208584	0.0031014	0.00124875	0.00522101	0.00776303	0.00312572
Peru	0.0226961	0.0295326	0.0150953	0.0100268	0.0130471	0.00666889	0.0116392	0.016494	0.00650972	0.00514201	0.00728682	0.0028759	0.011057	0.0162914	0.00661512	0.00488481	0.00719731	0.00292246
Philippines	0.0344122	0.0452491	0.0249665	0.00873212	0.011482	0.00633526	0.0157393	0.0222801	0.00944791	0.00399386	0.0056536	0.00239742	0.0186729	0.0262967	0.0117027	0.00473826	0.00667281	0.00296958
Poland	0.216567	0.243638	0.186959	0.0314244	0.0353523	0.0271281	0.108921	0.127389	0.0917087	0.0158046	0.0184844	0.0133071	0.107647	0.129069	0.0911508	0.0156197	0.0187282	0.0132262
Portugal	0.0753638	0.0852641	0.0677631	0.0294326	0.033299	0.0264642	0.0395362	0.0473518	0.0334664	0.0154405	0.0184928	0.01307	0.0358276	0.0414131	0.0305816	0.0139921	0.0161735	0.0119433
Puerto Rico	0.0173524	0.0197409	0.0152911	0.0163046	0.0185489	0.0143678	0.00931975	0.0111539	0.00767446	0.00875697	0.0104804	0.00721104	0.0080327	0.00981494	0.00657466	0.00754764	0.00922226	0.00617765
Qatar	0.0029862	0.00397199	0.00184685	0.00166148	0.00220995	0.00102756	0.00220789	0.00316755	0.00128798	0.00122844	0.00176238	0.000716612	0.00077831	0.00111835	0.000471117	0.000433039	0.000622235	0.000262122
Republic of Korea	0.143168	0.179842	0.103735	0.00787315	0.00988995	0.00570462	0.0790669	0.108671	0.0505783	0.00434808	0.0059761	0.00278143	0.064101	0.0876444	0.0464711	0.00352507	0.00481978	0.00255556
Republic of Moldova	0.00289813	0.00329321	0.00255523	0.0211668	0.0240523	0.0186624	0.00166049	0.0019773	0.00138031	0.0121276	0.0144414	0.0100813	0.00123764	0.00149941	0.00102727	0.00903921	0.0109511	0.0075028
Romania	0.073156	0.082112	0.0649537	0.0255274	0.0286526	0.0226653	0.0391444	0.045309	0.0332518	0.0136592	0.0158103	0.011603	0.0340116	0.0400866	0.0286094	0.0118682	0.013988	0.00998312
Russian Federation	0.388452	0.436453	0.342592	0.0210727	0.0236766	0.0185848	0.18799	0.225663	0.155701	0.010198	0.0122417	0.00844644	0.200462	0.245301	0.16666	0.0108747	0.0133071	0.00904094
Rwanda	0.00210948	0.00325988	0.00124455	0.0190571	0.0294498	0.0112433	0.00112821	0.00191326	0.000510453	0.0101923	0.0172844	0.00461144	0.000981271	0.00169778	0.000424054	0.00886482	0.0153377	0.00383091
Saint Kitts and Nevis	0.000124525	0.000144892	0.000105872	0.0145029	0.016875	0.0123304	2.88669e-05	3.48623e-05	2.40754e-05	0.003362	0.00406026	0.00280396	9.56579e-05	0.000116536	7.71595e-05	0.0111409	0.0135724	0.00898643
Saint Lucia	0.000381927	0.000437765	0.000336079	0.0204547	0.0234452	0.0179992	0.000209574	0.000258955	0.000170673	0.0112241	0.0138688	0.00914066	0.000172352	0.00021437	0.000139103	0.00923059	0.0114809	0.00744987
Saint Vincent and the Grenadines	0.000249556	0.000284824	0.000218492	0.0286114	0.0326549	0.02505	0.000145776	0.000177059	0.000119786	0.0167131	0.0202996	0.0137333	0.00010378	0.000128402	8.62854e-05	0.0118983	0.0147212	0.00989255
Samoa	6.7348e-05	0.000295982	2.16618e-05	0.00798035	0.0350721	0.0025668	5.59077e-05	0.000312098	8.92908e-06	0.00662473	0.0369817	0.00105804	1.14404e-05	2.0351e-05	5.03925e-06	0.00135562	0.00241147	0.000597121
San Marino	0.00030415	0.000476524	0.000185073	0.0163927	0.0256831	0.00997487	0.000146441	0.000255727	7.01637e-05	0.00789273	0.0137829	0.0037816	0.000157708	0.000255639	7.25677e-05	0.00849998	0.0137782	0.00391117
Sao Tome and Principe	2.41378e-05	3.9138e-05	1.423e-05	0.00460291	0.00746336	0.00271356	1.50782e-05	2.68176e-05	6.89651e-06	0.00287531	0.00511393	0.00131512	9.05958e-06	1.63587e-05	3.81315e-06	0.0017276	0.0031195	0.000727141
Saudi Arabia	0.062808	0.090516	0.0403231	0.00718499	0.0103547	0.00461281	0.0404742	0.0644097	0.021723	0.00463009	0.00736821	0.00248502	0.0223338	0.0363764	0.0117836	0.0025549	0.00416132	0.001348
Senegal	0.00148314	0.00222554	0.000891027	0.00538918	0.00808676	0.00323765	0.00092286	0.00161088	0.000426782	0.00335332	0.00585334	0.00155076	0.000560284	0.00102096	0.00023746	0.00203586	0.00370977	0.000862839
Serbia	0.0137273	0.0174427	0.0091966	0.0207487	0.0263645	0.0139006	0.00709866	0.00974514	0.00389346	0.0107295	0.0147297	0.00588493	0.00662869	0.00945546	0.00414884	0.0100192	0.0142918	0.00627094
Seychelles	0.000137855	0.000200449	8.34975e-05	0.00926961	0.0134785	0.00561451	5.27209e-05	8.98748e-05	2.19639e-05	0.00354504	0.00604333	0.00147689	8.51343e-05	0.000139196	4.13029e-05	0.00572457	0.00935976	0.00277728
Sierra Leone	0.000531679	0.000828563	0.000312751	0.00742028	0.0115637	0.00436485	0.000341438	0.000596403	0.000144525	0.00476521	0.00832359	0.00201703	0.000190241	0.000356313	7.98944e-05	0.00265506	0.00497281	0.00111503
Singapore	0.0597637	0.0671755	0.0526771	0.0137669	0.0154743	0.0121345	0.0320348	0.0382074	0.0269134	0.00737939	0.00880128	0.00619965	0.0277289	0.0322398	0.0230899	0.0063875	0.00742661	0.00531889
Slovakia	0.0185034	0.0265161	0.012957	0.0153438	0.0219882	0.0107444	0.00918162	0.0156537	0.0052603	0.00761378	0.0129807	0.00436206	0.00932174	0.0153598	0.00556498	0.00772997	0.0127369	0.00461471
Slovenia	0.0134481	0.0154098	0.0117504	0.0218564	0.0250446	0.0190973	0.00660786	0.00794585	0.00547038	0.0107394	0.0129139	0.00889069	0.00684023	0.00834025	0.00569273	0.011117	0.0135549	0.00925206
Solomon Islands	2.73663e-05	4.46098e-05	1.41306e-05	0.00179711	0.00292947	0.000927942	8.59799e-06	1.56504e-05	3.34194e-06	0.000564619	0.00102774	0.000219461	1.87683e-05	3.54041e-05	8.21019e-06	0.00123249	0.00232494	0.000539152
Somalia	0.0023424	0.00361929	0.00140567	0.0246984	0.0381621	0.0148215	0.00127204	0.00228125	0.00058949	0.0134125	0.0240536	0.00621563	0.00107036	0.00190889	0.000446692	0.0112859	0.0201275	0.00470995
South Africa	0.0498913	0.0682399	0.0339095	0.0118539	0.0162134	0.00805667	0.0259223	0.0379563	0.0143368	0.00615897	0.00901816	0.00340633	0.023969	0.0382528	0.0133953	0.00569488	0.00908862	0.00318263
Spain	0.347843	0.381256	0.317829	0.0238046	0.0260912	0.0217506	0.18443	0.205553	0.162203	0.0126215	0.014067	0.0111003	0.163413	0.183288	0.143529	0.0111831	0.0125433	0.0098224
Sri Lanka	0.00583464	0.00815465	0.00391981	0.00658468	0.00920292	0.00442369	0.00298175	0.00455802	0.00178277	0.00336505	0.00514395	0.00201194	0.00285289	0.00441968	0.0015675	0.00321963	0.00498783	0.001769
Sudan	0.0024927	0.00390801	0.00145238	0.00728232	0.0114171	0.00424305	0.00130095	0.00212146	0.000601767	0.00380067	0.00619774	0.00175804	0.00119175	0.00216931	0.000501456	0.00348165	0.00633754	0.00146498
Suriname	0.000477713	0.000729549	0.000302677	0.0153708	0.0234738	0.00973887	0.0002607	0.000436249	0.000144565	0.00838824	0.0140367	0.00465149	0.000217013	0.000376157	0.000117883	0.00698256	0.0121031	0.00379299
Sweden	0.195826	0.215946	0.17735	0.0307329	0.0338906	0.0278333	0.085991	0.0995561	0.0753186	0.0134954	0.0156243	0.0118205	0.109835	0.126347	0.0935328	0.0172375	0.0198289	0.014679
Switzerland	0.207961	0.237707	0.18076	0.0255666	0.0292235	0.0222225	0.114865	0.135902	0.0959428	0.0141214	0.0167077	0.0117951	0.0930963	0.112479	0.0773064	0.0114452	0.013828	0.009504
Syrian Arab Republic	0.000810952	0.00122232	0.000487155	0.00564997	0.00851598	0.00339405	0.00043588	0.00069475	0.000204453	0.00303681	0.00484038	0.00142444	0.000375072	0.000664887	0.0001705	0.00261316	0.00463232	0.00118789
Tajikistan	0.000365577	0.000544872	0.000215497	0.00409024	0.00609626	0.00241107	0.000216628	0.000358326	0.000106697	0.00242372	0.00400911	0.00119378	0.00014895	0.000263681	6.69836e-05	0.00166651	0.00295017	0.000749441
Thailand	0.0357722	0.0523233	0.0281274	0.00706602	0.0103353	0.00555595	0.0197382	0.031801	0.0144169	0.00389885	0.00628161	0.00284774	0.016034	0.021518	0.00999954	0.00316717	0.00425042	0.00197519
Timor-Leste	0.000242908	0.000363966	0.000150473	0.00670112	0.0100407	0.00415111	0.000101787	0.000169613	4.87403e-05	0.00280801	0.00467913	0.0013446	0.000141121	0.000252363	6.0254e-05	0.00389312	0.00696194	0.00166223
Togo	0.000507115	0.000773915	0.000315184	0.00607888	0.00927707	0.00377817	0.000320564	0.000541186	0.000149676	0.00384265	0.0064873	0.00179419	0.000186551	0.000355396	7.87553e-05	0.00223623	0.00426019	0.000944054
Tonga	7.32413e-06	1.16732e-05	3.9672e-06	0.0014133	0.00225252	0.000765533	1.77626e-06	3.23191e-06	6.8733e-07	0.000342756	0.000623646	0.000132631	5.54787e-06	9.61268e-06	2.41489e-06	0.00107055	0.00185491	0.000465991
Trinidad and Tobago	0.0053378	0.00609482	0.00471677	0.0217901	0.0248805	0.0192549	0.00307001	0.00371303	0.00254919	0.0125325	0.0151574	0.0104064	0.00226779	0.00277264	0.00186053	0.00925764	0.0113186	0.00759511
Tunisia	0.00545627	0.00770233	0.0034515	0.0116556	0.0164537	0.00737306	0.00317342	0.00504154	0.00169708	0.00677904	0.0107697	0.0036253	0.00228285	0.00361944	0.00122376	0.0048766	0.00773182	0.00261418
Turkiye	0.0966141	0.133417	0.0788779	0.0117841	0.0162731	0.00962084	0.0522685	0.0859319	0.0386437	0.00637525	0.0104812	0.00471342	0.0443457	0.0630537	0.036062	0.0054089	0.00769074	0.00439852
Turkmenistan	0.00302495	0.00350858	0.0026541	0.006049	0.00701613	0.0053074	0.00172527	0.0020818	0.00141416	0.00345003	0.00416298	0.00282791	0.00129968	0.001637	0.00103756	0.00259897	0.00327351	0.00207482
Tuvalu	1.90005e-06	3.12423e-06	1.02612e-06	0.00315641	0.00519006	0.00170462	5.29452e-07	9.09251e-07	2.2652e-07	0.000879541	0.00151047	0.000376302	1.37059e-06	2.52558e-06	6.30734e-07	0.00227687	0.00419556	0.00104779
Uganda	0.0077892	0.0158669	0.00490045	0.0192185	0.0391487	0.012091	0.00449628	0.0114557	0.00268858	0.0110938	0.0282648	0.00663359	0.00329292	0.00796341	0.0016647	0.0081247	0.0196483	0.00410734
Ukraine	0.0406124	0.0457338	0.0357078	0.02033	0.0228937	0.0178748	0.0208291	0.02484	0.0171847	0.0104267	0.0124346	0.00860243	0.0197833	0.024223	0.0166775	0.00990325	0.0121257	0.0083485
United Arab Emirates	0.0195538	0.0279879	0.0124587	0.00470972	0.00674116	0.0030008	0.00851049	0.0135919	0.00431385	0.00204984	0.00327374	0.00103903	0.0110433	0.0176659	0.00563185	0.00265988	0.00425502	0.00135649
United Kingdom	0.913806	1.02174	0.80197	0.0290713	0.0325051	0.0255134	0.470046	0.547653	0.395876	0.0149538	0.0174227	0.0125942	0.44376	0.516927	0.380056	0.0141175	0.0164452	0.0120909
United Republic of Tanzania	0.0112859	0.0176583	0.00661175	0.0159732	0.024992	0.00935771	0.00590881	0.0101944	0.0028855	0.00836283	0.0144283	0.00408389	0.00537713	0.00939636	0.00243082	0.00761034	0.0132988	0.00344038
United States of America	6.96232	7.65226	6.37247	0.0294002	0.0323137	0.0269095	3.64827	4.20244	3.19085	0.0154058	0.0177459	0.0134742	3.31405	3.78032	2.86465	0.0139945	0.0159634	0.0120967
United States Virgin Islands	0.00051809	0.000588707	0.000450737	0.0114952	0.0130621	0.0100008	0.000204297	0.000249768	0.000170168	0.00453288	0.00554179	0.00377565	0.000313793	0.000382185	0.000257706	0.00696235	0.0084798	0.00571791
Uruguay	0.0149009	0.0170169	0.0132946	0.0245238	0.0280064	0.0218802	0.00750158	0.00904434	0.00621423	0.0123461	0.0148852	0.0102274	0.0073993	0.00925712	0.00602704	0.0121778	0.0152353	0.00991929
Uzbekistan	0.00437532	0.00489722	0.0038601	0.00565725	0.00633206	0.00499107	0.00275251	0.00330595	0.00228352	0.00355897	0.00427456	0.00295257	0.00162281	0.00197659	0.00133522	0.00209828	0.00255571	0.00172643
Vanuatu	1.68398e-05	2.80215e-05	8.86477e-06	0.00177188	0.00294841	0.000932747	5.40401e-06	9.55864e-06	2.18625e-06	0.000568608	0.00100576	0.000230036	1.14358e-05	2.15935e-05	5.12038e-06	0.00120327	0.00227206	0.000538764
Viet Nam	0.0386571	0.0676368	0.0232451	0.0105484	0.018456	0.00634289	0.021544	0.0420473	0.00933997	0.00587871	0.0114734	0.0025486	0.0171131	0.0338894	0.00723047	0.00466967	0.0092474	0.00197298
Zambia	0.00422907	0.00645321	0.00219429	0.0191392	0.0292048	0.00993053	0.00224647	0.00405619	0.000939121	0.0101667	0.0183568	0.0042501	0.0019826	0.00359434	0.000861712	0.00897248	0.0162666	0.00389978
Zimbabwe	0.00531675	0.00837954	0.00338188	0.0195178	0.0307613	0.0124149	0.00254513	0.00466598	0.00111807	0.00934317	0.0171288	0.00410445	0.00277162	0.00485922	0.00121227	0.0101746	0.0178382	0.00445025
