# Supplementary material for: The Global, Regional, and National Economic Burden of Malignant Bone and Joint Neoplasms and Soft-Tissue and Other Extraosseous Sarcomas: A Health-Economic Modeling Study
Source: Research Square preprint supplement (doi:10.21203/rs.3.rs-8249604/v1), 2025-12-09
Supplement: Supplementary file 2 [file c7ee8774096d8eda02acdbcd.xlsx]

## Sheet: Sheet1
2021 VLW & VLW/GDP by Country for Total & Gender-stratified Malignant Neoplasms of Bone and Articular Cartilage.
IE=1.00 Country	Total Malignant Neoplasms of Bone and Articular Cartilage						Male Malignant Neoplasms of Bone and Articular Cartilage						Female Malignant Neoplasms of Bone and Articular Cartilage
	VLW($ billion）	VLW($ billion） [95% Cl]		VLW/GDP(%)	VLW/GDP(%) [95% Cl]		VLW($ billion）	VLW($ billion） [95% Cl]		VLW/GDP(%)	VLW/GDP(%) [95% Cl]		VLW($ billion）	VLW($ billion） [95% Cl]		VLW/GDP(%)	VLW/GDP(%) [95% Cl]
		upper	lower		upper	lower		upper	lower		upper	lower		upper	lower		upper	lower
Afghanistan	0.00172967	0.00300596	0.00101828	0.0121295	0.0210797	0.0071408	0.000653812	0.00127992	0.000331887	0.00458494	0.00897559	0.0023274	0.00107586	0.00247898	0.00049782	0.00754457	0.0173841	0.00349103
Albania	0.00481106	0.00852782	0.00267856	0.0266806	0.0472926	0.0148545	0.0032897	0.00640674	0.00157605	0.0182437	0.0355298	0.0087403	0.00152135	0.00283423	0.000749721	0.00843696	0.0157177	0.00415772
Algeria	0.0249601	0.0390713	0.015827	0.0134027	0.02098	0.00849856	0.0153082	0.0270022	0.00759007	0.00822	0.0144993	0.00407562	0.00965189	0.0197783	0.00465084	0.00518274	0.0106203	0.00249735
American Samoa	0.000153601	0.000223577	9.82329e-05	0.0204801	0.0298103	0.0130977	9.68832e-05	0.0001706	5.14426e-05	0.0129178	0.0227467	0.00685901	5.67173e-05	0.000104655	2.59367e-05	0.00756231	0.013954	0.00345823
Andorra	5.01115e-05	7.30872e-05	3.13366e-05	0.00150727	0.00219835	0.000942553	3.07728e-05	5.04634e-05	1.62127e-05	0.000925595	0.00151786	0.000487652	1.93387e-05	3.42702e-05	1.07973e-05	0.000581677	0.00103079	0.000324767
Angola	0.0053832	0.00892365	0.00287356	0.00809441	0.013418	0.0043208	0.00342358	0.00624407	0.00152703	0.00514784	0.00938885	0.00229611	0.00195962	0.00418745	0.000833798	0.00294657	0.00629643	0.00125374
Antigua and Barbuda	0.000145358	0.000170198	0.00012736	0.00907712	0.0106283	0.00795321	3.30096e-05	4.0501e-05	2.65172e-05	0.00206134	0.00252915	0.00165591	0.000112348	0.00013667	9.09929e-05	0.00701578	0.0085346	0.0056822
Argentina	0.0853255	0.0935587	0.0770627	0.0175363	0.0192284	0.0158381	0.0486455	0.0546122	0.043073	0.00999775	0.0112241	0.00885248	0.03668	0.0423972	0.0316037	0.00753858	0.00871358	0.00649529
Armenia	0.00312629	0.00359472	0.00272204	0.0225255	0.0259006	0.0196128	0.00177748	0.00215123	0.00143287	0.012807	0.0155	0.0103241	0.00134882	0.0016004	0.00110231	0.00971845	0.0115312	0.00794235
Australia	0.113215	0.12891	0.0975575	0.00727261	0.00828079	0.0062668	0.0676305	0.0791331	0.0562212	0.00434438	0.00508327	0.00361148	0.0455849	0.0561133	0.0357423	0.00292823	0.00360455	0.00229598
Austria	0.0471503	0.0534297	0.0405323	0.00981343	0.0111204	0.00843603	0.0264924	0.0314658	0.0216271	0.00551388	0.006549	0.00450127	0.0206579	0.0256285	0.0166616	0.00429955	0.00533407	0.0034678
Azerbaijan	0.00633953	0.0108152	0.00359861	0.0115631	0.0197267	0.00656376	0.00390751	0.00794857	0.00187113	0.00712719	0.014498	0.0034129	0.00243202	0.00539583	0.00120517	0.00443593	0.00984183	0.0021982
Bahamas	0.00124912	0.001459	0.00105543	0.0109872	0.0128333	0.0092835	0.000739977	0.000914165	0.000574134	0.00650878	0.00804093	0.00505004	0.000509147	0.00062223	0.00040845	0.00447842	0.00547309	0.00359269
Bahrain	0.00469924	0.00679633	0.00331529	0.0115064	0.0166413	0.00811771	0.00340168	0.00546875	0.00212939	0.00832923	0.0133906	0.00521395	0.00129756	0.00225614	0.000804135	0.00317717	0.0055243	0.00196898
Bangladesh	0.061157	0.0957517	0.0366712	0.0146916	0.0230022	0.00880943	0.0400603	0.0725435	0.0188403	0.0096236	0.017427	0.00452596	0.0210967	0.0432911	0.00982367	0.00506801	0.0103997	0.00235992
Barbados	0.00102765	0.00122184	0.000895214	0.0194807	0.0231618	0.0169701	0.000408877	0.000518699	0.00032193	0.00775087	0.00983271	0.00610266	0.000618778	0.000753718	0.000500325	0.0117298	0.0142878	0.0094844
Belarus	0.0114165	0.0136778	0.00980136	0.0163857	0.0196312	0.0140675	0.00619885	0.00797926	0.00483753	0.00889696	0.0114523	0.00694311	0.00521769	0.00649953	0.00413745	0.00748875	0.00932851	0.00593832
Belgium	0.081823	0.0945696	0.0696451	0.0136715	0.0158013	0.0116367	0.0464331	0.0559632	0.0369701	0.00775832	0.00935067	0.00617718	0.0353899	0.0408645	0.028736	0.00591315	0.00682789	0.00480139
Belize	0.000282129	0.000333699	0.000242689	0.0116556	0.0137861	0.0100262	0.000173387	0.000220154	0.000138395	0.00716313	0.00909521	0.00571751	0.000108742	0.000131895	8.60835e-05	0.00449244	0.00544899	0.00355636
Benin	0.0016582	0.00268982	0.000919207	0.00937362	0.0152053	0.00519617	0.00103876	0.00197664	0.000454622	0.00587199	0.0111737	0.00256993	0.000619441	0.00131538	0.000283982	0.00350163	0.00743567	0.00160532
Bermuda	0.000771198	0.000923546	0.000655484	0.0105838	0.0126746	0.00899574	0.00053908	0.000671066	0.000431237	0.00739822	0.00920958	0.00591821	0.000232119	0.000285121	0.000188311	0.00318555	0.00391295	0.00258434
Bhutan	0.00044386	0.000711669	0.000243244	0.0160308	0.0257031	0.00878518	0.000282257	0.000542129	0.000122521	0.0101942	0.0195799	0.00442505	0.000161603	0.000357475	7.39185e-05	0.00583658	0.0129108	0.00266969
Bolivia (Plurinational State of)	0.0100565	0.0153142	0.00577304	0.0248885	0.0379006	0.0142875	0.00517938	0.00912453	0.00236038	0.0128183	0.0225821	0.00584165	0.00487709	0.00995958	0.00218128	0.0120702	0.0246487	0.00539839
Bosnia and Herzegovina	0.00414683	0.00567458	0.00293559	0.0175174	0.023971	0.0124008	0.00242707	0.00375632	0.00145987	0.0102526	0.0158677	0.0061669	0.00171977	0.00277356	0.00109884	0.00726477	0.0117163	0.00464179
Botswana	0.00300962	0.00516186	0.00178596	0.0160505	0.0275285	0.00952463	0.00183792	0.00355073	0.000878214	0.00980176	0.0189363	0.00468357	0.0011717	0.00245352	0.000551222	0.00624875	0.0130848	0.0029397
Brazil	0.359491	0.389399	0.33361	0.0215181	0.0233083	0.0199689	0.206512	0.228621	0.184976	0.0123612	0.0136846	0.0110721	0.152979	0.172078	0.137815	0.00915689	0.0103001	0.0082492
Brunei Darussalam	0.000628589	0.000859579	0.000443699	0.00448784	0.006137	0.00316781	0.000449979	0.000708915	0.000277301	0.00321265	0.00506133	0.00197981	0.00017861	0.000287564	0.000116766	0.00127519	0.00205308	0.000833653
Bulgaria	0.0235182	0.0266986	0.0206966	0.0278592	0.0316267	0.0245168	0.0129914	0.0155912	0.0106826	0.0153893	0.0184691	0.0126544	0.0105268	0.0125983	0.00863121	0.0124699	0.0149237	0.0102244
Burkina Faso	0.00180289	0.00293895	0.000968714	0.00915288	0.0149204	0.00491795	0.00104827	0.00187453	0.000434128	0.00532182	0.00951656	0.00220398	0.000754624	0.001688	0.00029817	0.00383106	0.00856959	0.00151375
Burundi	0.000426815	0.000747072	0.00021072	0.0153763	0.0269138	0.00759132	0.000274705	0.0004896	0.000109266	0.00989644	0.0176382	0.00393639	0.00015211	0.000316865	6.27564e-05	0.00547987	0.0114153	0.00226084
C?te d'Ivoire	0.00597514	0.00945454	0.00349992	0.00820822	0.012988	0.00480793	0.00354649	0.00670154	0.00169488	0.00487192	0.00920609	0.0023283	0.00242865	0.00468646	0.00115587	0.0033363	0.00643792	0.00158785
Cabo Verde	0.000161724	0.000269549	9.94131e-05	0.0078819	0.0131369	0.00484506	0.000116977	0.000230296	6.13647e-05	0.00570105	0.0112239	0.00299071	4.47477e-05	0.000103046	2.07735e-05	0.00218085	0.0050221	0.00101243
Cambodia	0.0065457	0.0113849	0.0036859	0.017792	0.0309454	0.0100187	0.00346156	0.00694333	0.00172447	0.00940892	0.0188728	0.00468731	0.00308415	0.00668274	0.00148765	0.00838307	0.0181645	0.0040436
Cameroon	0.00592626	0.0100517	0.00310598	0.013166	0.0223312	0.00690035	0.00371881	0.00677306	0.00149808	0.00826183	0.0150473	0.00332818	0.00220745	0.00481522	0.000934172	0.00490413	0.0106976	0.00207539
Canada	0.179284	0.204308	0.15649	0.00893081	0.0101774	0.00779539	0.102735	0.118724	0.0871631	0.00511761	0.0059141	0.00434193	0.0765489	0.0919249	0.0624906	0.0038132	0.00457914	0.0031129
Central African Republic	0.000306234	0.000536448	0.000162214	0.0121691	0.0213172	0.00644603	0.000190977	0.000372866	8.36828e-05	0.00758898	0.0148169	0.00332537	0.000115258	0.000242116	4.36195e-05	0.00458008	0.00962115	0.00173334
Chad	0.00110925	0.00182023	0.000551459	0.00941636	0.0154519	0.00468133	0.000718332	0.00129759	0.000293634	0.00609791	0.0110152	0.00249266	0.000390914	0.000823425	0.00015638	0.00331846	0.00699003	0.00132751
Chile	0.0463637	0.053345	0.0409386	0.0146946	0.0169073	0.0129752	0.0246373	0.0296487	0.020117	0.00780861	0.00939692	0.00637593	0.0217264	0.0258481	0.0179221	0.00688601	0.00819235	0.00568027
China	4.06085	4.76477	2.77119	0.0227876	0.0267376	0.0155506	2.42613	2.95822	1.49812	0.0136143	0.0166001	0.00840675	1.63471	1.98372	1.11373	0.00917324	0.0111317	0.00624973
Colombia	0.0529843	0.0578903	0.0477187	0.0166343	0.0181745	0.0149812	0.0281477	0.0315265	0.0247507	0.00883691	0.00989765	0.00777041	0.0248366	0.0286713	0.0208178	0.00779739	0.00900129	0.00653569
Comoros	0.000279169	0.000483669	0.000144337	0.0215393	0.0373175	0.0111363	0.000171032	0.000327536	7.356e-05	0.013196	0.0252711	0.00567554	0.000108137	0.000211436	4.12132e-05	0.00834332	0.0163134	0.00317981
Congo	0.00164888	0.00274597	0.000932955	0.0111218	0.0185217	0.00629283	0.000985926	0.00178751	0.000446992	0.00665012	0.0120568	0.00301498	0.00066295	0.00143283	0.0002967	0.00447163	0.00966449	0.00200125
Costa Rica	0.00819527	0.00945321	0.00690107	0.0126157	0.0145522	0.0106235	0.00494964	0.00597721	0.00386191	0.00761944	0.00920127	0.005945	0.00324563	0.00391389	0.00267816	0.00499629	0.00602501	0.00412274
Croatia	0.0189901	0.02176	0.01658	0.0275191	0.0315331	0.0240266	0.0102955	0.0124382	0.00858562	0.0149196	0.0180247	0.0124417	0.00869453	0.0103991	0.00721155	0.0125995	0.0150696	0.0104505
Cyprus	0.00495388	0.00684161	0.00306268	0.0163102	0.0225254	0.0100836	0.00317001	0.0051686	0.00162999	0.010437	0.0170171	0.00536661	0.00178387	0.00296619	0.000966066	0.00587323	0.00976592	0.00318069
Czechia	0.0358832	0.0406657	0.0319325	0.0123322	0.0139758	0.0109744	0.019641	0.023254	0.0164224	0.00675013	0.00799181	0.00564395	0.0162422	0.0189582	0.0139749	0.00558204	0.00651544	0.00480282
Democratic Republic of the Congo	0.00429894	0.00759783	0.00228055	0.00776984	0.0137322	0.00412184	0.00277996	0.00525162	0.00123976	0.00502446	0.00949171	0.00224073	0.00151898	0.00341508	0.000585323	0.00274538	0.00617238	0.00105791
Denmark	0.0346868	0.0396825	0.0299514	0.00849378	0.00971709	0.00733423	0.0189007	0.0226944	0.015442	0.00462823	0.00555721	0.00378131	0.0157861	0.0197305	0.0124894	0.00386555	0.00483144	0.00305829
Djibouti	0.000733408	0.00116664	0.000351172	0.0216611	0.0344567	0.0103718	0.00053623	0.00095877	0.000211145	0.0158375	0.0283172	0.00623615	0.000197179	0.000389129	8.47263e-05	0.00582365	0.0114929	0.00250238
Dominica	0.000145694	0.000194442	0.000101856	0.0262386	0.0350178	0.0183436	4.60688e-05	7.34757e-05	2.89367e-05	0.00829671	0.0132325	0.00521132	9.96255e-05	0.000153365	5.86707e-05	0.0179419	0.0276201	0.0105662
Dominican Republic	0.0195205	0.0271228	0.0127787	0.0207128	0.0287795	0.0135592	0.0116159	0.018285	0.00616175	0.0123254	0.0194019	0.00653812	0.00790459	0.0126112	0.00446808	0.00838742	0.0133815	0.004741
Ecuador	0.0184796	0.0209942	0.0162153	0.0172007	0.0195413	0.0150931	0.00887127	0.0107029	0.00723499	0.00825733	0.00996216	0.00673429	0.00960829	0.0114266	0.00808333	0.00894334	0.0106358	0.00752392
Egypt	0.0927071	0.126186	0.0642722	0.0218303	0.0297137	0.0151346	0.0520483	0.0793141	0.0343025	0.0122561	0.0186766	0.00807742	0.0406589	0.0627924	0.0252429	0.00957418	0.0147861	0.0059441
El Salvador	0.00387328	0.00526772	0.00277965	0.0133363	0.0181376	0.00957075	0.00192901	0.00311609	0.00120754	0.00664189	0.0107292	0.00415776	0.00194427	0.00314569	0.00122726	0.00669441	0.0108311	0.00422565
Equatorial Guinea	0.00103158	0.00172134	0.000545581	0.00844462	0.014091	0.00446616	0.000680682	0.00124139	0.000308486	0.00557211	0.0101621	0.00252529	0.000350902	0.000715285	0.000157825	0.00287251	0.00585537	0.00129197
Estonia	0.00293071	0.0034196	0.00251151	0.0078773	0.00919134	0.00675055	0.00177527	0.00214535	0.00140743	0.00477164	0.00576636	0.00378295	0.00115545	0.00137034	0.000957094	0.00310566	0.00368327	0.00257252
Eswatini	0.000883386	0.00141228	0.000462077	0.018646	0.0298096	0.00975326	0.000504604	0.00095066	0.000221085	0.0106509	0.020066	0.00466653	0.000378782	0.000788621	0.000155754	0.0079951	0.0166458	0.00328757
Ethiopia	0.0199106	0.0337715	0.0104921	0.0178952	0.0303532	0.00943011	0.0121786	0.0209557	0.00502501	0.0109458	0.0188346	0.00451638	0.00773203	0.0157491	0.00311933	0.0069494	0.014155	0.00280359
Fiji	0.000804498	0.00120161	0.000478814	0.0186874	0.0279119	0.0111222	0.000493203	0.000797918	0.000227788	0.0114564	0.0185345	0.00529121	0.000311295	0.000561585	0.000149267	0.00723096	0.0130448	0.00346726
Finland	0.0150243	0.0172064	0.012814	0.00510641	0.00584809	0.0043552	0.00848639	0.0101292	0.00683522	0.00288434	0.00344269	0.00232314	0.00653787	0.00821995	0.00518961	0.00222208	0.00279378	0.00176383
France	0.490593	0.547861	0.430316	0.0165382	0.0184687	0.0145062	0.270401	0.311123	0.221291	0.00911537	0.0104881	0.00745984	0.220192	0.25908	0.186524	0.00742278	0.00873373	0.00628782
Gabon	0.00174416	0.00280427	0.00101235	0.00896975	0.0144216	0.00520621	0.00110066	0.00194634	0.00047519	0.0056604	0.0100095	0.00244377	0.000643501	0.00127032	0.000289969	0.00330935	0.0065329	0.00149123
Gambia	0.00023554	0.000398571	0.000143985	0.0116942	0.0197884	0.00714864	0.000144654	0.000265432	7.10908e-05	0.00718187	0.0131783	0.00352955	9.08855e-05	0.000208233	4.01235e-05	0.00451233	0.0103384	0.00199207
Georgia	0.00775108	0.00874353	0.00683233	0.041113	0.0463771	0.0362398	0.00458073	0.0055368	0.00375207	0.0242969	0.0293681	0.0199016	0.00317036	0.00370319	0.00260298	0.0168161	0.0196423	0.0138066
Germany	0.390735	0.420296	0.36384	0.00898592	0.00966576	0.00836742	0.215955	0.236869	0.193664	0.00496643	0.0054474	0.0044538	0.174779	0.194538	0.157615	0.00401949	0.00447389	0.00362474
Ghana	0.00843778	0.0135826	0.00452388	0.0106103	0.0170798	0.00568867	0.00508205	0.00853789	0.00221202	0.00639056	0.0107362	0.00278156	0.00335573	0.00695151	0.00142503	0.00421974	0.00874135	0.00179194
Greece	0.0626884	0.0689679	0.0560442	0.0287161	0.0315926	0.0256726	0.0348603	0.0389697	0.0311386	0.0159687	0.0178511	0.0142639	0.0278281	0.0320188	0.0231142	0.0127474	0.0146671	0.0105881
Greenland	0.000177713	0.000286259	0.000107734	0.00549208	0.0088466	0.00332942	0.000130393	0.000244182	6.71763e-05	0.00402968	0.00754624	0.00207603	4.73204e-05	8.65245e-05	2.3437e-05	0.0014624	0.00267397	0.000724301
Grenada	0.000132433	0.000156432	0.000113103	0.0117949	0.0139323	0.0100733	9.66357e-05	0.00011906	7.7519e-05	0.00860667	0.0106039	0.00690408	3.57975e-05	4.39479e-05	2.89716e-05	0.00318824	0.00391413	0.0025803
Guam	0.000252895	0.000296767	0.000216612	0.00405671	0.00476046	0.00347468	0.000157319	0.000194608	0.000125142	0.00252357	0.00312173	0.00200741	9.55757e-05	0.000116249	7.7026e-05	0.00153314	0.00186475	0.00123558
Guatemala	0.0113255	0.0132091	0.00996235	0.0130962	0.0152744	0.01152	0.00618671	0.00749706	0.00502466	0.00715402	0.00866925	0.00581028	0.00513876	0.00614902	0.00422186	0.00594221	0.00711043	0.00488196
Guinea	0.00208052	0.00368533	0.0012589	0.0121888	0.0215906	0.00737529	0.00120338	0.00219824	0.000574255	0.00705003	0.0128785	0.00336429	0.000877139	0.0019063	0.000393038	0.00513875	0.0111681	0.00230263
Guinea-Bissau	0.000191835	0.000312594	0.000102983	0.0103482	0.0168623	0.00555525	0.000114529	0.00020043	4.70736e-05	0.00617809	0.0108119	0.00253931	7.73061e-05	0.000167317	3.41459e-05	0.00417015	0.00902566	0.00184194
Guyana	0.00151616	0.00177143	0.00130234	0.0188545	0.022029	0.0161955	0.000890293	0.00111014	0.000698111	0.0110714	0.0138054	0.0086815	0.000625869	0.000774092	0.000501515	0.00778312	0.00962638	0.00623669
Haiti	0.00308784	0.00564319	0.00174858	0.0147903	0.0270301	0.00837545	0.00169032	0.00343564	0.000742765	0.00809641	0.0164563	0.00355774	0.00139752	0.00309977	0.000613955	0.00669391	0.0148475	0.00294076
Honduras	0.00265351	0.00429977	0.00160156	0.00942822	0.0152776	0.00569053	0.00126676	0.00244715	0.000586451	0.00450093	0.00869499	0.00208373	0.00138675	0.00284536	0.000638744	0.00492729	0.0101099	0.00226953
Hungary	0.0216486	0.0243221	0.0192422	0.0118876	0.0133557	0.0105662	0.0116464	0.013473	0.00999299	0.00639525	0.00739826	0.00548734	0.0100022	0.0117553	0.00821308	0.00549238	0.00645506	0.00450996
Iceland	0.00293539	0.00334224	0.00254484	0.0113664	0.0129417	0.00985405	0.00157292	0.00189072	0.00129519	0.00609061	0.00732121	0.00501519	0.00136248	0.00161489	0.00113614	0.00527574	0.00625315	0.00439932
India	0.487531	0.727374	0.299305	0.0153928	0.0229653	0.00944993	0.304184	0.539497	0.161101	0.00960399	0.0170335	0.00508643	0.183347	0.359631	0.0921635	0.00578881	0.0113546	0.00290987
Indonesia	0.267518	0.446979	0.152982	0.0225466	0.0376717	0.0128934	0.144815	0.295048	0.0711064	0.0122052	0.0248669	0.00599291	0.122702	0.276834	0.0611914	0.0103414	0.0233318	0.00515726
Iran (Islamic Republic of)	0.0373804	0.0549174	0.0250543	0.00974878	0.0143224	0.00653416	0.0219665	0.037821	0.0120309	0.00572885	0.0098637	0.00313765	0.0154139	0.0279486	0.00850275	0.00401993	0.00728897	0.00221751
Iraq	0.03681	0.0549704	0.0249974	0.0175543	0.0262148	0.011921	0.0219741	0.0367757	0.0117695	0.0104792	0.017538	0.00561275	0.0148358	0.022933	0.0090532	0.00707506	0.0109365	0.00431738
Ireland	0.0458358	0.0538072	0.0398094	0.00862701	0.0101273	0.00749274	0.0264994	0.0317662	0.0218434	0.0049876	0.00597888	0.00411126	0.0193364	0.0242735	0.0156015	0.00363941	0.00456864	0.00293644
Israel	0.0335566	0.0392473	0.0292097	0.00685237	0.00801442	0.00596472	0.0202828	0.0248286	0.0160715	0.00414182	0.00507007	0.00328185	0.0132738	0.0162923	0.0109264	0.00271055	0.00332695	0.0022312
Italy	0.320087	0.364533	0.27396	0.0146882	0.0167278	0.0125716	0.178871	0.209983	0.147154	0.00820807	0.00963576	0.00675262	0.141216	0.175996	0.113564	0.00648017	0.00807616	0.00521127
Jamaica	0.00350877	0.00409939	0.00297583	0.0239382	0.0279677	0.0203023	0.00198958	0.00249467	0.00154926	0.0135737	0.0170197	0.0105697	0.00151919	0.00188308	0.00124248	0.0103645	0.0128471	0.0084767
Japan	0.294894	0.3285	0.26161	0.00585733	0.00652483	0.00519623	0.16391	0.186939	0.142656	0.00325566	0.00371306	0.0028335	0.130984	0.155567	0.1087	0.00260167	0.00308994	0.00215906
Jordan	0.00712514	0.0105685	0.0045564	0.0153904	0.0228281	0.00984186	0.00471208	0.00803498	0.00269267	0.0101781	0.0173556	0.00581619	0.00241307	0.00461604	0.00137029	0.00521225	0.00997069	0.00295985
Kazakhstan	0.0112228	0.0128283	0.00990679	0.00569359	0.00650814	0.00502596	0.00668535	0.00805787	0.0053749	0.00339164	0.00408796	0.00272682	0.00453742	0.00538469	0.00373641	0.00230195	0.00273179	0.00189558
Kenya	0.0229497	0.0359704	0.0126706	0.0209197	0.0327887	0.0115499	0.0145475	0.0253576	0.00658974	0.0132608	0.0231146	0.00600686	0.00840215	0.0171056	0.00359304	0.00765895	0.0155926	0.00327523
Kiribati	2.69669e-05	4.32895e-05	1.58948e-05	0.00932018	0.0149615	0.00549347	1.81369e-05	3.12397e-05	8.38358e-06	0.00626837	0.0107969	0.00289749	8.83007e-06	2.02134e-05	4.12927e-06	0.0030518	0.00698606	0.00142714
Kuwait	0.0114104	0.0133991	0.00971358	0.00768586	0.00902542	0.00654293	0.00809489	0.0101099	0.00645633	0.0054526	0.0068099	0.00434889	0.00331548	0.00398287	0.00269953	0.00223326	0.0026828	0.00181836
Kyrgyzstan	0.0026845	0.00308844	0.00234279	0.0290243	0.0333917	0.0253299	0.00150647	0.00184312	0.00121533	0.0162877	0.0199275	0.0131399	0.00117803	0.00143221	0.000959235	0.0127366	0.0154848	0.0103711
Lao People's Democratic Republic	0.00324814	0.00553083	0.00187823	0.0172525	0.0293769	0.0099762	0.00178995	0.00352854	0.000897897	0.00950727	0.0187418	0.00476916	0.0014582	0.00328318	0.000714066	0.00774519	0.0174386	0.00379274
Latvia	0.00668947	0.00770217	0.00584159	0.0175185	0.0201706	0.0152981	0.0038216	0.0046518	0.00312393	0.0100081	0.0121822	0.00818101	0.00286787	0.00347802	0.00238617	0.00751044	0.0091083	0.00624896
Lebanon	0.00371673	0.00557616	0.0025462	0.0160675	0.0241059	0.0110073	0.00224876	0.00382035	0.00126298	0.00972144	0.0165155	0.00545989	0.00146797	0.00260593	0.000794464	0.00634609	0.0112655	0.00343449
Lesotho	0.000395018	0.000619186	0.000226823	0.0163763	0.0256697	0.00940341	0.000198781	0.000355395	9.60715e-05	0.00824088	0.0147336	0.00398285	0.000196237	0.000401049	9.09324e-05	0.00813542	0.0166264	0.0037698
Liberia	0.000376447	0.000610827	0.000204267	0.0107157	0.0173874	0.00581453	0.000228356	0.000412934	9.66195e-05	0.00650022	0.0117543	0.0027503	0.000148091	0.000315564	6.46633e-05	0.00421544	0.00898261	0.00184066
Libya	0.00426164	0.00753946	0.00245148	0.0121008	0.021408	0.00696087	0.00157542	0.003321	0.000796346	0.00447333	0.00942985	0.00226119	0.00268622	0.00587506	0.00130894	0.00762742	0.016682	0.00371668
Lithuania	0.00709676	0.0080393	0.0061688	0.0105863	0.0119923	0.00920204	0.00415585	0.00487216	0.00333997	0.00619931	0.00726784	0.00498225	0.00294091	0.0035144	0.00243392	0.00438697	0.00524246	0.0036307
Luxembourg	0.00781084	0.00883874	0.00681643	0.00912651	0.0103276	0.0079646	0.00394993	0.00472161	0.00323556	0.00461526	0.00551693	0.00378057	0.00386091	0.00465453	0.0031457	0.00451125	0.00543855	0.00367556
Madagascar	0.00220231	0.00356052	0.00112384	0.0151312	0.0244629	0.00772148	0.00130123	0.00235541	0.000516144	0.00894025	0.0161831	0.00354622	0.000901077	0.00178609	0.000368565	0.00619094	0.0122715	0.00253227
Malawi	0.00205408	0.00355047	0.00106098	0.0165944	0.0286834	0.00857145	0.00127492	0.00232196	0.00052868	0.0102998	0.0187586	0.00427108	0.000779158	0.00166398	0.000311619	0.00629464	0.0134429	0.00251749
Malaysia	0.035716	0.0516621	0.0235286	0.00955524	0.0138213	0.0062947	0.0197353	0.0310142	0.0120867	0.00527987	0.00829734	0.0032336	0.0159807	0.027708	0.00994557	0.00427537	0.00741282	0.00266077
Maldives	0.000446702	0.000626807	0.00029746	0.00850462	0.0119336	0.00566325	0.000325998	0.000523663	0.000203817	0.00620658	0.00996987	0.00388042	0.000120704	0.000198614	7.31942e-05	0.00229805	0.00378135	0.00139352
Mali	0.00183577	0.00328276	0.00088949	0.00950709	0.0170008	0.0046065	0.00107717	0.00196413	0.00040833	0.00557848	0.0101719	0.00211466	0.000758594	0.00148726	0.000318535	0.00392861	0.00770224	0.00164963
Malta	0.00240323	0.00279367	0.00210754	0.0121877	0.0141677	0.0106881	0.00152734	0.00179251	0.00126489	0.00774568	0.00909045	0.0064147	0.000875893	0.00108611	0.000731864	0.00444197	0.00550803	0.00371155
Marshall Islands	3.43897e-05	6.5717e-05	1.26794e-05	0.013283	0.0253832	0.00489741	1.57114e-05	3.44606e-05	4.3822e-06	0.00606853	0.0133104	0.00169262	1.86782e-05	4.25004e-05	7.64453e-06	0.00721446	0.0164158	0.0029527
Mauritania	0.000911642	0.00153384	0.000469577	0.00988494	0.0166314	0.00509162	0.000607009	0.00107761	0.000248288	0.0065818	0.0116845	0.00269219	0.000304633	0.000628532	0.000126421	0.00330314	0.00681518	0.00137078
Mauritius	0.00296583	0.0034614	0.0025874	0.025825	0.0301401	0.0225298	0.00187025	0.00227323	0.00152101	0.0162852	0.0197941	0.0132442	0.00109558	0.00132409	0.000887191	0.00953976	0.0115295	0.00772522
Mexico	0.255778	0.288381	0.220043	0.0194276	0.021904	0.0167134	0.142266	0.166566	0.118843	0.0108058	0.0126515	0.00902674	0.113511	0.137203	0.0891659	0.00862175	0.0104212	0.0067726
Micronesia (Federated States of)	4.60553e-05	7.24961e-05	2.78328e-05	0.0118091	0.0185887	0.00713661	1.98637e-05	3.46524e-05	1.17145e-05	0.00509325	0.00888523	0.00300372	2.61917e-05	5.08482e-05	1.31847e-05	0.00671581	0.013038	0.00338069
Monaco	0.000190289	0.000324783	8.04205e-05	0.0022067	0.00376636	0.000932602	9.37912e-05	0.000204607	3.56272e-05	0.00108766	0.00237274	0.000413153	9.64978e-05	0.000227774	3.59493e-05	0.00111904	0.00264139	0.000416888
Mongolia	0.00308065	0.00438919	0.00205397	0.0201528	0.028713	0.0134365	0.00191734	0.00296165	0.00109844	0.0125427	0.0193744	0.00718569	0.00116331	0.00186494	0.000659101	0.00761008	0.0122	0.00431167
Montenegro	0.000938915	0.00126971	0.000660602	0.0160185	0.0216621	0.0112703	0.000563415	0.000858503	0.000345912	0.00961224	0.0146467	0.0059015	0.0003755	0.000586873	0.000232326	0.00640629	0.0100125	0.00396365
Morocco	0.0145484	0.024269	0.0089711	0.0102438	0.0170882	0.00631669	0.00927547	0.0187209	0.0046465	0.00653101	0.0131817	0.00327168	0.00527293	0.0113251	0.00256712	0.00371275	0.0079742	0.00180755
Mozambique	0.0030512	0.00551169	0.00177291	0.0188718	0.03409	0.0109655	0.00188094	0.00370907	0.000949369	0.0116337	0.0229407	0.00587188	0.00117026	0.00257727	0.000549664	0.00723811	0.0159405	0.00339969
Myanmar	0.0141024	0.0232807	0.00845832	0.0212561	0.0350901	0.0127489	0.0068671	0.0138318	0.00341746	0.0103505	0.0208481	0.00515101	0.00723533	0.0161073	0.00341741	0.0109056	0.0242779	0.00515094
Namibia	0.00192204	0.00296695	0.00121676	0.0154972	0.0239222	0.00981063	0.00116141	0.00217223	0.000594633	0.00936435	0.0175145	0.00479446	0.000760628	0.00147626	0.000336496	0.00613287	0.011903	0.00271313
Nauru	2.02058e-05	4.07296e-05	7.75141e-06	0.0115123	0.0232059	0.00441641	7.38841e-06	1.61159e-05	1.98748e-06	0.00420958	0.00918209	0.00113238	1.28174e-05	3.02029e-05	5.36322e-06	0.00730276	0.0172083	0.00305572
Nepal	0.00588706	0.0095766	0.00341874	0.0159434	0.0259354	0.00925864	0.00362277	0.00652971	0.00168559	0.00981121	0.0176838	0.00456492	0.00226429	0.00491963	0.00110514	0.00613216	0.0133234	0.00299294
Netherlands	0.0928625	0.104747	0.080619	0.00880654	0.00993357	0.00764544	0.0534362	0.0616287	0.0445807	0.00506758	0.00584451	0.00422778	0.0394263	0.0473913	0.0310434	0.00373896	0.00449432	0.00294397
New Zealand	0.0207955	0.0236981	0.018116	0.0081987	0.00934304	0.00714229	0.0112905	0.013078	0.00947434	0.00445133	0.00515604	0.00373529	0.00950498	0.0114555	0.00811058	0.00374737	0.00451637	0.00319762
Nicaragua	0.00191504	0.00250621	0.00145063	0.0135395	0.0177192	0.0102561	0.00109573	0.00165132	0.000740624	0.00774693	0.011675	0.00523629	0.000819304	0.00122394	0.00056279	0.00579257	0.00865341	0.00397899
Niger	0.00118965	0.00196466	0.000586576	0.00797619	0.0131723	0.00393279	0.000750109	0.00132423	0.000285239	0.00502922	0.00887849	0.00191243	0.00043954	0.000915823	0.000168669	0.00294697	0.00614028	0.00113087
Nigeria	0.055026	0.085478	0.0300339	0.0124823	0.0193901	0.00681299	0.0368951	0.0673499	0.016573	0.00836939	0.0152779	0.00375947	0.018131	0.0374011	0.00788165	0.00411288	0.00848417	0.0017879
North Macedonia	0.00604592	0.00886179	0.00437565	0.0431843	0.0632972	0.031254	0.00367774	0.00579669	0.00236393	0.026269	0.0414041	0.0168849	0.00236818	0.00368259	0.00153414	0.0169153	0.0263037	0.0109579
Northern Mariana Islands	7.25682e-05	0.000110569	4.32433e-05	0.00793963	0.0120973	0.00473121	5.06528e-05	8.13594e-05	2.6026e-05	0.00554189	0.00890146	0.00284749	2.19154e-05	4.04837e-05	1.14199e-05	0.00239775	0.00442929	0.00124945
Norway	0.0496407	0.0580336	0.0417927	0.00986171	0.0115291	0.00830262	0.032451	0.0384429	0.0262509	0.00644678	0.00763714	0.00521505	0.0171897	0.0213282	0.0132414	0.00341493	0.0042371	0.00263056
Oman	0.00216715	0.00345308	0.00133977	0.00248174	0.00395434	0.00153425	0.00130323	0.00260509	0.000679444	0.00149241	0.00298325	0.000778074	0.000863916	0.00174172	0.000442587	0.000989325	0.00199455	0.000506834
Pakistan	0.0601854	0.0916626	0.0352019	0.017269	0.0263008	0.0101005	0.0339907	0.065195	0.0149473	0.00975295	0.0187064	0.00428883	0.0261948	0.0545931	0.0123747	0.00751608	0.0156644	0.00355069
Palau	3.84528e-06	8.85683e-06	1.56417e-06	0.00163106	0.00375683	0.000663478	3.92699e-09	9.85392e-09	3.5424e-11	1.66572e-06	4.17977e-06	1.50259e-08	3.84136e-06	8.85558e-06	1.56628e-06	0.0016294	0.0037563	0.000664373
Panama	0.00790154	0.00916502	0.00690885	0.011724	0.0135987	0.0102511	0.00442654	0.00544995	0.00351496	0.00656792	0.00808642	0.00521535	0.003475	0.00423416	0.00284017	0.00515606	0.00628248	0.00421412
Papua New Guinea	0.00175374	0.00374458	0.000553831	0.00671688	0.0143419	0.00212119	0.000892532	0.00202335	0.000211353	0.00341843	0.00774952	0.000809492	0.000861207	0.00216884	0.000282311	0.00329845	0.00830674	0.00108126
Paraguay	0.0114954	0.0157318	0.00802958	0.0287737	0.0393779	0.0200986	0.00652946	0.00996061	0.0037805	0.0163437	0.0249321	0.00946287	0.0049659	0.00793769	0.00276498	0.01243	0.0198686	0.00692095
Peru	0.0375699	0.0479536	0.0282408	0.0165978	0.0211852	0.0124764	0.0201553	0.026408	0.0144882	0.00890432	0.0116667	0.00640067	0.0174146	0.0266847	0.0101702	0.00769351	0.0117889	0.00449306
Philippines	0.132713	0.191882	0.0943374	0.033676	0.0486901	0.0239382	0.0754499	0.111172	0.0491616	0.0191455	0.0282101	0.0124748	0.0572631	0.0850799	0.0389053	0.0145306	0.0215891	0.00987225
Poland	0.102854	0.112464	0.0945643	0.0149243	0.0163188	0.0137215	0.0583758	0.0662367	0.0520623	0.00847045	0.00961108	0.00755435	0.0444777	0.050835	0.0392067	0.0064538	0.00737627	0.00568898
Portugal	0.0547372	0.0626682	0.0472539	0.0213771	0.0244744	0.0184545	0.0301198	0.0358997	0.0242039	0.011763	0.0140203	0.00945259	0.0246174	0.0296823	0.0202844	0.00961409	0.0115921	0.00792187
Puerto Rico	0.0122984	0.0142333	0.0106294	0.0115558	0.0133738	0.00998755	0.0068462	0.00836541	0.00553738	0.00643279	0.00786026	0.005203	0.00545221	0.00656981	0.00457024	0.00512298	0.00617309	0.00429426
Qatar	0.00804415	0.0110493	0.00538988	0.00447564	0.00614767	0.00299885	0.00586293	0.00901528	0.00367791	0.00326204	0.00501595	0.00204633	0.00218122	0.00350359	0.00142706	0.00121359	0.00194934	0.000793992
Republic of Korea	0.101262	0.138575	0.0806807	0.00556864	0.0076206	0.00443683	0.0620504	0.0877522	0.0465578	0.0034123	0.00482571	0.00256033	0.0392116	0.0573254	0.0293399	0.00215634	0.00315247	0.00161347
Republic of Moldova	0.00324654	0.00375413	0.00279197	0.0237114	0.0274187	0.0203915	0.00204103	0.00248866	0.00165	0.0149069	0.0181762	0.0120509	0.00120551	0.00148815	0.000980941	0.00880454	0.0108688	0.0071644
Romania	0.0947093	0.102776	0.0877709	0.0330483	0.0358632	0.0306272	0.0570753	0.06105	0.0526236	0.0199162	0.0213031	0.0183628	0.0376339	0.0453097	0.0317251	0.0131322	0.0158106	0.0110703
Russian Federation	0.252829	0.287203	0.221777	0.0137154	0.0155801	0.0120309	0.139486	0.166346	0.114507	0.0075668	0.00902393	0.00621173	0.113343	0.134823	0.0945159	0.00614862	0.00731388	0.00512728
Rwanda	0.00191146	0.0031624	0.00103259	0.0172682	0.0285691	0.00932846	0.00118183	0.00213192	0.000476045	0.0106766	0.0192598	0.0043006	0.000729636	0.00150094	0.000307718	0.00659154	0.0135595	0.00277993
Saint Kitts and Nevis	0.000182377	0.000210758	0.00015705	0.0212407	0.0245461	0.0182909	8.15324e-05	9.99642e-05	6.41632e-05	0.00949573	0.0116424	0.00747281	0.000100845	0.000122738	8.25244e-05	0.0117449	0.0142948	0.00961126
Saint Lucia	0.000277825	0.000326022	0.000239226	0.0148794	0.0174606	0.0128121	0.000155107	0.000195194	0.000121354	0.00830699	0.0104539	0.00649929	0.000122718	0.000149836	9.72217e-05	0.00657236	0.00802468	0.00520686
Saint Vincent and the Grenadines	0.000373336	0.000443296	0.000317802	0.0428027	0.0508235	0.0364357	0.000233994	0.000292311	0.000186082	0.0268272	0.0335132	0.0213341	0.000139342	0.000169702	0.000112673	0.0159755	0.0194562	0.0129178
Samoa	0.000185476	0.000291942	0.000101363	0.0219778	0.0345935	0.0120109	0.000123365	0.000213909	5.31922e-05	0.0146181	0.025347	0.00630296	6.21106e-05	0.000134463	2.7047e-05	0.00735974	0.0159331	0.00320491
San Marino	0.000196539	0.000278292	0.000118701	0.0105928	0.014999	0.00639759	7.51611e-05	0.000123296	4.06911e-05	0.00405095	0.00664527	0.00219312	0.000121378	0.000199787	6.87116e-05	0.00654188	0.0107679	0.00370334
Sao Tome and Principe	5.12281e-05	8.28224e-05	2.7135e-05	0.00976884	0.0157937	0.00517447	3.44488e-05	5.98664e-05	1.46796e-05	0.00656915	0.0114161	0.0027993	1.67793e-05	3.64578e-05	7.38332e-06	0.0031997	0.00695226	0.00140795
Saudi Arabia	0.10501	0.142075	0.0753579	0.0120127	0.0162528	0.00862065	0.0637528	0.0941197	0.0400191	0.00729307	0.0107669	0.00457802	0.0412573	0.0666243	0.0248722	0.00471967	0.00762156	0.00284528
Senegal	0.00279753	0.00457262	0.00149141	0.0101652	0.0166152	0.0054192	0.00187207	0.00336289	0.000758952	0.00680237	0.0122194	0.00275774	0.000925464	0.00186695	0.000402954	0.00336278	0.00678379	0.00146418
Serbia	0.0264325	0.0334651	0.0209974	0.0399524	0.0505822	0.0317373	0.0152831	0.0208997	0.011794	0.0231003	0.0315897	0.0178266	0.0111493	0.0165567	0.00698238	0.0168521	0.0250253	0.0105538
Seychelles	6.571e-05	9.23567e-05	4.57895e-05	0.00441845	0.00621021	0.00307896	3.0701e-05	4.9595e-05	1.96311e-05	0.00206438	0.00333485	0.00132003	3.5009e-05	5.70405e-05	2.12195e-05	0.00235406	0.0038355	0.00142683
Sierra Leone	0.000686731	0.00113497	0.000361014	0.00958424	0.0158401	0.00503843	0.000412687	0.000729739	0.000172882	0.00575959	0.0101845	0.00241279	0.000274044	0.000561437	0.000117988	0.00382465	0.00783559	0.00164668
Singapore	0.0190945	0.021982	0.0163594	0.00439853	0.00506367	0.00376849	0.0118592	0.0141633	0.00984791	0.00273183	0.0032626	0.00226852	0.00723536	0.00884919	0.00557319	0.00166671	0.00203846	0.00128381
Slovakia	0.0214768	0.0313255	0.0138102	0.0178095	0.0259763	0.011452	0.0120775	0.0187648	0.00680544	0.0100152	0.0155605	0.00564335	0.00939931	0.016349	0.00472413	0.00779429	0.0135572	0.00391744
Slovenia	0.00556863	0.00653718	0.00487235	0.00905038	0.0106245	0.00791875	0.00301968	0.00363316	0.00252394	0.00490772	0.00590477	0.00410201	0.00254895	0.00315457	0.00210667	0.00414266	0.00512694	0.00342385
Solomon Islands	0.000111929	0.000227594	4.00872e-05	0.00735024	0.0149458	0.00263248	5.40476e-05	0.000117151	1.41224e-05	0.00354924	0.00769315	0.000927399	5.78815e-05	0.000144465	2.29038e-05	0.003801	0.00948681	0.00150407
Somalia	0.00180346	0.00303063	0.000900619	0.0190159	0.0319552	0.0094962	0.00114754	0.00210455	0.000449059	0.0120998	0.0221905	0.00473492	0.000655924	0.0013863	0.000262655	0.00691611	0.0146172	0.00276945
South Africa	0.0433708	0.0614779	0.0288268	0.0103046	0.0146068	0.00684905	0.0270712	0.0418152	0.0150848	0.00643194	0.00993502	0.00358404	0.0162996	0.0274838	0.00961026	0.00387269	0.00652998	0.00228333
Spain	0.192365	0.214415	0.169199	0.0131644	0.0146734	0.0115791	0.105544	0.120279	0.0897451	0.00722287	0.00823125	0.00614169	0.0868207	0.105013	0.072574	0.00594156	0.00718656	0.00496659
Sri Lanka	0.0108908	0.014947	0.00894917	0.0122908	0.0168684	0.0100996	0.00620764	0.00855035	0.00483797	0.00700563	0.00964949	0.00545988	0.00468313	0.00701603	0.00353108	0.00528514	0.00791794	0.003985
Sudan	0.00357118	0.00626958	0.00217487	0.0104331	0.0183163	0.00635378	0.00200178	0.00400583	0.00102281	0.00584812	0.0117029	0.0029881	0.0015694	0.00344533	0.000741265	0.00458493	0.0100654	0.00216557
Suriname	0.000475988	0.0007215	0.000302238	0.0153153	0.0232148	0.00972476	0.00032032	0.000517159	0.000165065	0.0103066	0.01664	0.00531112	0.000155668	0.000296158	8.4373e-05	0.00500874	0.00952914	0.00271477
Sweden	0.0420575	0.0482215	0.0361541	0.0066005	0.00756787	0.00567402	0.0233546	0.027669	0.019295	0.00366526	0.00434238	0.00302815	0.0187029	0.0226452	0.0145054	0.00293524	0.00355394	0.00227648
Switzerland	0.0540699	0.0620385	0.0459564	0.00664732	0.00762698	0.00564986	0.0289436	0.0342157	0.0233796	0.00355831	0.00420646	0.00287427	0.0251263	0.0315205	0.0200255	0.00308901	0.00387511	0.00246192
Syrian Arab Republic	0.000416683	0.000701667	0.000243754	0.00290306	0.00488857	0.00169825	0.000256513	0.000513489	0.000129785	0.00178715	0.00357752	0.000904226	0.000160169	0.000339066	7.43717e-05	0.00111591	0.0023623	0.000518154
Tajikistan	0.0017908	0.00274157	0.00103459	0.0200363	0.0306738	0.0115755	0.00120378	0.00213475	0.000576416	0.0134684	0.0238845	0.00644919	0.000587019	0.00111676	0.00028981	0.00656782	0.0124948	0.00324252
Thailand	0.133853	0.210658	0.0883333	0.0264398	0.0416109	0.0174483	0.075309	0.122601	0.0446606	0.0148757	0.0242171	0.00882172	0.0585442	0.0976566	0.0338197	0.0115641	0.0192899	0.00668035
Timor-Leste	0.000532227	0.000949051	0.00029095	0.0146826	0.0261815	0.00802645	0.000313432	0.000610194	0.000154937	0.00864667	0.0168335	0.00427425	0.000218794	0.000538582	9.51367e-05	0.00603589	0.0148579	0.00262454
Togo	0.000748959	0.00119094	0.000417	0.00897791	0.0142761	0.00499866	0.000456822	0.000779412	0.000195494	0.00547601	0.00934295	0.00234342	0.000292137	0.000636815	0.000130311	0.0035019	0.00763362	0.00156206
Tonga	4.78302e-05	9.50313e-05	1.83271e-05	0.00922957	0.0183377	0.00353648	2.34782e-05	5.34613e-05	6.01217e-06	0.00453048	0.0103162	0.00116014	2.4352e-05	5.6731e-05	1.05956e-05	0.00469909	0.0109471	0.00204457
Trinidad and Tobago	0.00409209	0.00482215	0.00350806	0.0167049	0.0196852	0.0143207	0.00230349	0.00285763	0.0018274	0.00940338	0.0116655	0.00745988	0.0017886	0.00218117	0.00144704	0.00730148	0.00890404	0.00590716
Tunisia	0.00671026	0.009492	0.00427951	0.0143344	0.0202767	0.00914185	0.00406779	0.0063916	0.00219722	0.00868959	0.0136537	0.00469368	0.00264247	0.00462536	0.00140815	0.00564482	0.00988066	0.00300808
Turkiye	0.119554	0.164223	0.0908967	0.0145821	0.0200304	0.0110868	0.0737096	0.116017	0.0524969	0.00899045	0.0141507	0.00640312	0.0458444	0.0654514	0.0354141	0.00559169	0.00798319	0.00431951
Turkmenistan	0.00782619	0.00963456	0.00563337	0.01565	0.0192662	0.0112651	0.00453813	0.0060701	0.00262969	0.0090749	0.0121384	0.0052586	0.00328806	0.00418398	0.00190994	0.00657514	0.00836672	0.00381932
Tuvalu	7.92208e-06	1.49814e-05	3.02918e-06	0.0131604	0.0248876	0.00503215	3.51875e-06	7.9544e-06	9.41742e-07	0.00584545	0.0132141	0.00156445	4.40333e-06	1.05474e-05	1.89907e-06	0.00731493	0.0175216	0.0031548
Uganda	0.00692091	0.0100158	0.00481453	0.0170761	0.0247122	0.011879	0.00444874	0.00711461	0.00282403	0.0109765	0.017554	0.00696779	0.00247217	0.0040944	0.00151411	0.00609962	0.0101022	0.0037358
Ukraine	0.0333493	0.0383561	0.0277193	0.0166942	0.0192005	0.0138759	0.0194064	0.0238985	0.0153186	0.00971458	0.0119633	0.00766828	0.0139429	0.0168822	0.0109567	0.0069796	0.00845098	0.0054848
United Arab Emirates	0.0233091	0.0381289	0.0136607	0.00561423	0.00918373	0.00329032	0.0122061	0.0233579	0.00598441	0.00293996	0.005626	0.0014414	0.011103	0.0207318	0.00620679	0.00267426	0.00499347	0.00149497
United Kingdom	0.375781	0.429996	0.328301	0.0119549	0.0136797	0.0104444	0.19915	0.23795	0.164322	0.00633565	0.00757001	0.00522764	0.176631	0.214318	0.144639	0.00561926	0.00681821	0.00460145
United Republic of Tanzania	0.0121512	0.019802	0.00667953	0.0171978	0.028026	0.00945365	0.00757377	0.0140717	0.00300843	0.0107193	0.0199159	0.00425788	0.00457745	0.0102134	0.00212254	0.00647853	0.0144552	0.00300406
United States of America	2.72402	3.08147	2.35577	0.0115029	0.0130123	0.00994787	1.50331	1.74944	1.24411	0.00634812	0.00738746	0.00525357	1.22071	1.47375	0.956402	0.00515477	0.00622329	0.00403866
United States Virgin Islands	0.000254669	0.000295023	0.000220141	0.00565053	0.00654588	0.00488441	0.000140011	0.000170642	0.00011129	0.00310653	0.00378615	0.00246928	0.000114658	0.000138541	9.20028e-05	0.002544	0.0030739	0.00204133
Uruguay	0.00246471	0.00290564	0.00213426	0.00405641	0.00478209	0.00351255	0.00166344	0.00204303	0.00133255	0.00273768	0.00336242	0.0021931	0.00080127	0.000960561	0.000662502	0.00131873	0.00158089	0.00109034
Uzbekistan	0.014975	0.0168725	0.0132809	0.0193625	0.021816	0.0171721	0.00849113	0.0101356	0.00701138	0.010979	0.0131053	0.00906566	0.00648386	0.00771476	0.0054237	0.00838358	0.00997512	0.0070128
Vanuatu	7.86259e-05	0.000155859	2.76349e-05	0.00827298	0.0163994	0.00290773	3.79761e-05	8.04115e-05	1.03831e-05	0.00399583	0.00846086	0.0010925	4.06499e-05	0.000102416	1.61227e-05	0.00427716	0.0107762	0.00169642
Viet Nam	0.0668605	0.108646	0.039016	0.0182442	0.0296461	0.0106463	0.0418192	0.0759721	0.0196903	0.0114112	0.0207305	0.00537291	0.0250413	0.0522193	0.0117879	0.00683301	0.0142491	0.00321655
Zambia	0.00395397	0.00624638	0.00226072	0.0178941	0.0282688	0.0102312	0.0024258	0.00457446	0.00106773	0.0109782	0.0207023	0.00483213	0.00152817	0.00322712	0.000709782	0.00691591	0.0146047	0.0032122
Zimbabwe	0.00412183	0.00663645	0.00219182	0.0151312	0.0243624	0.00804618	0.00216093	0.00379299	0.00086559	0.00793277	0.0139241	0.00317758	0.0019609	0.00413556	0.00085305	0.00719848	0.0151816	0.00313155
